# Supplementary material for: Three States Involving Vibronic Resonance is a Key to Enhancing Reverse Intersystem Crossing Dynamics of an Organoboron-Based Ultrapure Blue Emitter
Source: PubMed Central journal article supplement — JACS Au. 2021 Jun 3;1(7):987–97. doi: 10.1021/jacsau.1c00179 (PMC8395647; doi:10.1021/jacsau.1c00179), 2021-06-03
Supplement: au1c00179_si_001.pdf [file au1c00179_si_001.pdf]

Supporting Information:  
Three States Involving Vibronic Resonance Is  
a Key to Enhancing Reverse Intersystem  
Crossing Dynamics of an Organoboron-Based  
Ultrapure Blue Emitter

Inkoo Kim,<sup>†</sup> Kwang Hyun Cho,<sup>‡</sup> Soon Ok Jeon,<sup>¶</sup> Won-Joon Son,<sup>\*,†</sup>  
Dongwook Kim,<sup>\*,§</sup> Young Min Rhee,<sup>\*,‡</sup> Inkook Jang,<sup>†</sup> Hyeonho Choi,<sup>¶</sup> and  
Dae Sin Kim<sup>†</sup>

<sup>†</sup>*Data and Information Technology Center, Samsung Electronics,  
Hwaseong 18448, Republic of Korea.*

<sup>‡</sup>*Department of Chemistry, Korea Advanced Institute of Science and Technology (KAIST),  
Daejeon 34141, Republic of Korea.*

<sup>¶</sup>*Samsung Advanced Institute of Technology, Samsung Electronics,  
Suwon 16678, Republic of Korea.*

<sup>§</sup>*Department of Chemistry, Kyonggi University,  
Suwon 16227, Republic of Korea.*

E-mail: wonjoon.son@samsung.com; dongwook-kim@kyonggi.ac.kr; ymrhee@kaist.ac.kr

# Supporting Information Texts

## 1. Spin–vibronic model

Details of the centerpiece of our spin–vibronic model for RISC have been described elsewhere.<sup>S1</sup> In essence, the electronic wavefunctions of the  $S_1$ – $T_1$  spin–orbit coupling element,  $\langle S_1, \nu' | \hat{H}_{SO} | T_1, \nu \rangle$ , are first perturbatively expanded in the singlet and the triplet manifolds to reflect the non-Born–Oppenheimer vibronic coupling, and then the coupling element within the spin–vibronic model is obtained by collecting the second-order terms that possess both the spin–orbit (SO) and the non-Born–Oppenheimer (nBO) terms. These are brought into the golden rule formula in combination with the first-order direct spin–orbit (DSO) coupling term. We assumed that DSO coupling between a pair of any singlet and triplet states is constant (Condon approximation). While we considered only the expansion in the triplet spin-manifold in ref S1, we extended the spin–vibronic model here to further incorporate the singlet manifold for a more complete and quantitative treatment of the second-order contribution to  $k_{\text{RISC}}$ .

With the Condon approximation, the vibronic integrals of DSO coupling can be written as

$$\langle S_J, \nu' | \hat{H}_{SO} | T_I^M, \nu \rangle \simeq \langle S_J | \hat{H}_{SO} | T_I^M \rangle \langle \nu' | \nu \rangle \quad (\text{S1})$$

where  $I$  and  $J$  label excited states while  $\nu$  and  $\nu'$  denote vibrational states. Of course,  $M$  represents the projected spin quantum number. The electronic spin–orbit coupling in the right-hand-side of this equation can be effectively described with the one-electron Breit–Pauli Hamiltonian (see e.g., ref S2).

To the first order, the nBO coupling between two vibronic states of the same spin sym-

metry can be approximated as<sup>S3</sup>

$$\langle X_J, \nu' | \hat{H}_{\text{nBO}} | X_I, \nu \rangle \simeq \sum_{\kappa} \langle X_J | \hat{P}_{\kappa} | X_I \rangle \langle \nu' | \hat{P}_{\kappa} | \nu \rangle \quad (\text{S2})$$

with  $X = \text{S}, \text{T}$ . Here,  $\hat{P}_{\kappa} \equiv -i\hbar \partial/\partial Q_{\kappa}$  is the momentum operator in the  $\kappa$ th normal coordinate  $Q_{\kappa}$ . The electronic part of the derivative coupling between the excited states can be efficiently calculated, for instance, with TDDFT.<sup>S4</sup>

Substituting eqs S1 and S2 with  $\langle \nu' | \nu'' \rangle = \delta_{\nu', \nu''}$ , the coupling (eq 1 in the main text) can then be cast into

$$H'_M = \langle \text{S}_1 | \hat{H}_{\text{SO}} | \text{T}_1^M \rangle \langle \nu' | \nu \rangle + \sum_{\kappa} (t_{\kappa}^M + s_{\kappa}^M) \langle \nu' | \hat{P}_{\kappa} | \nu \rangle \quad (\text{S3})$$

with

$$t_{\kappa} = \frac{1}{2} \sum_{n=2} \langle \text{S}_1 | \hat{H}_{\text{SO}} | \text{T}_n \rangle \langle \text{T}_n | \hat{P}_{\kappa} | \text{T}_1 \rangle \left( \frac{1}{E_{\text{T}_n} - E_{\text{T}_1}} + \frac{1}{E_{\text{T}_n} - E_{\text{S}_1}} \right) \quad (\text{S4})$$

$$s_{\kappa} = \frac{1}{2} \sum_{n=2} \langle \text{S}_1 | \hat{P}_{\kappa} | \text{S}_n \rangle \langle \text{S}_n | \hat{H}_{\text{SO}} | \text{T}_1 \rangle \left( \frac{1}{E_{\text{S}_n} - E_{\text{T}_1}} + \frac{1}{E_{\text{S}_n} - E_{\text{S}_1}} \right) \quad (\text{S5})$$

which represent the second-order contributions from the triplet and the singlet manifolds, respectively. We note that a semi-classical approximation has been employed to remove vibrational energy dependencies in the denominators. Figure 3b in the main text was obtained by treating the contributions by  $t_{\kappa}$  and  $s_{\kappa}$  in a separate manner to perform a quantitative analysis of the relative second-order contributions by different spin manifolds with the terms defined in eq 4 in the main text.

Finally, the golden rule rate expression (eq 1 in the main text) can be rewritten as

$$k_{\text{RISC}} = \frac{2\pi}{\hbar} \sum_{\nu\nu'} P_{\nu}(T) \left[ K_{\text{SO}} \langle \nu | \nu' \rangle \langle \nu' | \nu \rangle + \sum_{\kappa\kappa'} (T_{\kappa\kappa'} + S_{\kappa\kappa'} + C_{\kappa\kappa'}) \langle \nu | \hat{P}_{\kappa} | \nu' \rangle \langle \nu' | \hat{P}_{\kappa'} | \nu \rangle \right] \times \delta(-\Delta E_{\text{ST}} + E_{\nu} - E_{\nu'}) \quad (\text{S6})$$

with the following coupling element and matrices:

$$K_{\text{SO}} = \frac{1}{3} \sum_M \left| \langle S_1 | \hat{H}_{\text{SO}} | T_1^M \rangle \right|^2 \quad (\text{S7})$$

$$\mathbf{T} = \sum_M \vec{t}^M \vec{t}^{M\dagger} = \frac{1}{3} \Re[\mathbf{T}^{(0)} + 2\mathbf{T}^{(1)}] \quad (\text{S8})$$

$$\mathbf{S} = \sum_M \vec{s}^M \vec{s}^{M\dagger} = \frac{1}{3} \Re[\mathbf{S}^{(0)} + 2\mathbf{S}^{(1)}] \quad (\text{S9})$$

$$\mathbf{C} = 2 \sum_M \vec{t}^M \vec{s}^{M\dagger} = \frac{2}{3} \Re[\mathbf{C}^{(0)} + 2\mathbf{C}^{(1)}] \quad (\text{S10})$$

where  $\vec{t}$  and  $\vec{s}$  are the vectors formed by  $\{t_\kappa\}$  and  $\{s_\kappa\}$ . Thermal averaging over the triplet substates are conveniently encoded in the above equations. We note that the time-reversal symmetry has been imposed in the derivation. As a result, the cross-term between the first- and the second-order vanishes, and the second-order coupling becomes real-valued. Previously in ref S1, the contributions by  $\mathbf{S}$  and  $\mathbf{C}$  were neglected. Under the harmonic approximation, the analytical solution for eq S6 can be obtained in the framework of a correlation function.<sup>S1,S5-S7</sup> This is in conjunction with Duschinsky transformations,<sup>S8</sup> which furnishes a linear relationship between two geometries and the corresponding normal coordinates,  $\mathbf{Q}_{T_1} = \mathbf{Q}_{S_1} \mathbf{J} + \mathbf{d}$ , where  $\mathbf{J}$  is the mode-mixing matrix and the vector  $\mathbf{d}$  is the displacement between the harmonic vibrational parabolas. By Fourier transforming the  $\delta$ -function with the scaled time  $\tau = t/\hbar$ , one can finally arrive at the rate equation in the time domain,

$$k_{\text{RISC}} = \frac{1}{\hbar Z} \int_{-\infty}^{\infty} d\tau \exp(-i\Delta E_{\text{ST}}\tau) \rho_{\text{DSO}}(\tau, \tau') \times \left( K_{\text{SO}} + \sum_{\kappa\kappa'} (T_{\kappa\kappa'} + S_{\kappa\kappa'} + C_{\kappa\kappa'}) \chi_{\text{SV}}(\tau, \tau'; \kappa, \kappa') \right) \quad (\text{S11})$$

and the correlation functions  $\rho_{\text{DSO}}(\tau, \tau')$  and  $\chi_{\text{SV}}(\tau, \tau'; \kappa, \kappa')$  bear analytical solutions from



the path-integral formulation:<sup>S1</sup>

$$\rho_{\text{DSO}}(\tau, \tau') = \sqrt{\frac{\text{prod}(\mathbf{a}) \text{prod}(\mathbf{a}')}{\det(\mathbf{K})}} \exp\left(-\frac{i}{\hbar} \left[\frac{1}{2} \mathbf{f}^T \mathbf{K}^{-1} \mathbf{f} - \mathbf{d}^T \mathbf{E} \mathbf{d}\right]\right) \quad (\text{S12})$$

$$\chi_{\text{SV}}(\tau, \tau'; \kappa, \kappa') = i\hbar \text{Tr}[\mathbf{G}(\kappa, \kappa') \mathbf{K}^{-1}] + [\mathbf{K}^{-1} \mathbf{f}]^T \mathbf{G}(\kappa, \kappa') [\mathbf{K}^{-1} \mathbf{f}] - \mathbf{h}^T(\kappa, \kappa') [\mathbf{K}^{-1} \mathbf{f}] \quad (\text{S13})$$

where  $\tau' = -\tau - i(k_{\text{B}}T)^{-1}$  and the intermediate matrices and vectors are defined by

$$\mathbf{E} = \text{diag}(\mathbf{b}' - \mathbf{a}') \quad (\text{S14})$$

$$\mathbf{K} = \begin{bmatrix} \mathbf{B} & -\mathbf{A} \\ -\mathbf{A} & \mathbf{B} \end{bmatrix} \quad (\text{S15})$$

$$\mathbf{A} = \text{diag}(\mathbf{a}) + \mathbf{J}^T \text{diag}(\mathbf{a}') \mathbf{J} \quad (\text{S16})$$

$$\mathbf{B} = \text{diag}(\mathbf{b}) + \mathbf{J}^T \text{diag}(\mathbf{b}') \mathbf{J} \quad (\text{S17})$$

$$\mathbf{f} = [\mathbf{d}^T \mathbf{E} \mathbf{J} \quad \mathbf{d}^T \mathbf{E} \mathbf{J}]^T \quad (\text{S18})$$

$$\mathbf{G}(\kappa, \kappa') = \begin{bmatrix} \mathbf{G}_{11}(\kappa, \kappa') & \mathbf{G}_{12}(\kappa, \kappa') \\ \mathbf{G}_{21}(\kappa, \kappa') & \mathbf{G}_{22}(\kappa, \kappa') \end{bmatrix} \quad (\text{S19})$$

$$\mathbf{h}^T(\kappa, \kappa') = [\mathbf{h}_1^T(\kappa, \kappa') \quad \mathbf{h}_2^T(\kappa, \kappa')] \quad (\text{S20})$$

with their elements given as

$$a_\mu = \omega_\mu / \sin(\hbar\omega_\mu\tau) \quad (\text{S21})$$

$$b_\mu = \omega_\mu / \tan(\hbar\omega_\mu\tau) \quad (\text{S22})$$

$$a'_\mu = \omega'_\mu / \sin(\hbar\omega'_\mu\tau') \quad (\text{S23})$$

$$b'_\mu = \omega'_\mu / \tan(\hbar\omega'_\mu\tau') \quad (\text{S24})$$

$$G_{11,\mu\nu}(\kappa, \kappa') = -\delta_{\mu\kappa'} b'_\kappa [\mathbf{J}^T \text{diag}(\mathbf{a}') \mathbf{J}]_{\kappa\nu} \quad (\text{S25})$$

$$G_{12,\mu\nu}(\kappa, \kappa') = \delta_{\mu\kappa'} b'_\kappa [\mathbf{J}^T \text{diag}(\mathbf{b}') \mathbf{J}]_{\kappa\nu} \quad (\text{S26})$$

$$G_{21,\mu\nu}(\kappa, \kappa') = \delta_{\mu\kappa'} a'_\kappa [\mathbf{J}^T \text{diag}(\mathbf{a}') \mathbf{J}]_{\kappa\nu} \quad (\text{S27})$$

$$G_{22,\mu\nu}(\kappa, \kappa') = -\delta_{\mu\kappa'} a'_\kappa [\mathbf{J}^T \text{diag}(\mathbf{b}') \mathbf{J}]_{\kappa\nu} \quad (\text{S28})$$

$$h_{1,\mu}(\kappa, \kappa') = \delta_{\mu\kappa'} b'_{\kappa} [\mathbf{d}^T \mathbf{E} \mathbf{J}]_{\kappa} \quad (\text{S29})$$

$$h_{2,\mu}(\kappa, \kappa') = -\delta_{\mu\kappa'} a'_{\kappa} [\mathbf{d}^T \mathbf{E} \mathbf{J}]_{\kappa} \quad (\text{S30})$$

In practice, we found the time integration interval of  $[-6553.6:6553.6]$  fs with a time step of 0.1 fs to be satisfactory from the viewpoint of both cost and precision, and hence we used these conditions for calculating all correlation functions here. Also with the adopted conditions, the time correlation functions well converged to zero and stayed there in the long time limit (for instance, Figures S11 and S12).

## 2. Quantum chemical calculations

As discussed in the main text, accurately predicting the relative energies as well as the geometries of the involved excited states is of the key importance for elucidating any excited-state dynamics. We employed the SCS-ADC(2)/SVP level of theory for geometry optimizations as it can incorporate higher-order electron correlation effects into the excited states. The optimized geometries and the corresponding vibrational frequencies with the scaling factor 0.9631 as suggested in ref S9 are provided in Tables S5 and S6. At these geometries, the excited state energy gaps with various levels of theory were additionally calculated to assess the performance of the methods (Table S3). In comparison with the experimental data in the solution phase,  $\Delta E_{\text{ST}}$  from the SCS-CC2 level agrees quite well, while SCS-ADC(2) slightly underestimates the energy gap. A number of progressively larger basis sets were also tested to evaluate the basis set effect on  $\Delta E_{\text{ST}}$ . From this, we only observed slight shifts. We note that even the gap-tuned DFT functional  $\omega^*\text{B97X}$  substantially overestimates the singlet–triplet gap, mostly due to the lack of higher-order correlations. However, due to the unavailability of the spin–orbit coupling and the derivative coupling between excited states in both CC2 and ADC(2) methods, we have resorted to the gap-tuned  $\omega^*\text{B97X}$  for computing those elements. At least, we attested for a reproduction of the triplet–triplet gap  $\Delta E_{\text{TT}}$ , which can dominate the magnitude of the nonadiabatic coupling. As is common

with molecules containing only light elements, scalar relativistic effect was not considered. The electronic structure of the excited states were compared with the ADC(2) results using the natural transition orbital (NTO) analysis to match the ordering of excited states. For readers who are curious about the transition characters, we have also listed the hole-particle NTO pairs related to the 18 each lowest singlet and triplet excited states in Figure S4.

### 3. Well-defined character of $k_{\text{RISC}}$

The Fermi golden rule rate expressions given by eq S6 and by eq 1 in the main text possess a  $\delta$ -function, which will contribute infinitely whenever the discrete vibrational distribution function  $P_\nu$  overlaps with the infinity condition of the  $\delta$ -function. This potential divergence issue arises because eq S32 is constructed without considering any dephasing or broadening effects that do exist in nature, and can be avoided by introducing some damping through replacing the  $\delta$ -function with a sharp Lorentzian or Gaussian function with a damping time  $\gamma$ .<sup>S10,S11</sup> For example, the Lorentzian function will take the form of

$$\delta'(-\Delta E_{\text{ST}} + E_\nu - E_{\nu'}) = \frac{1}{\pi} \frac{\Gamma}{\Gamma^2 + (\Delta E_{\text{ST}} - E_\nu + E_{\nu'})^2} \quad (\text{S31})$$

with  $\Gamma = \hbar/\gamma$ . Often,  $\gamma$  cannot be known with accuracy, and there may be situations where the rate calculation leads to some ambiguity. Fortunately for DABNA, this did not happen. Indeed, as shown in Table S9 and Figure S13 the rates were almost identical regardless of the value of  $\gamma$ . Thus, we have chosen the rate obtained at the longest  $\gamma$  value (100 ns) in our discussion in the main text, assuming that the dephasing related to RISC will take a rather long time. In fact, the rate has essentially converged beyond 1 ns, and the value at  $\gamma = 100$  ns is practically the same as the rate obtained without any damping.

With this, one may wonder why the rate without any damping does not diverge even with the true  $\delta$ -function with a potential infinity condition. This convergence can be explained in

the following manner. When the equation is changed into a Fourier transform format:

$$k_{\text{RISC}} = \frac{1}{Z} \int_{-\infty}^{\infty} d\tau \exp(-i\Delta E_{\text{ST}}) \bar{\rho}(\tau, \tau') \quad (\text{S32})$$

with the total time correlation  $\bar{\rho}$  bearing  $\rho_{\text{DSO}}$  and  $\chi_{\text{SV}}$ , that infinity must get into  $\bar{\rho}$  such that it is not bounded in time. Namely,  $\bar{\rho}$  will not decay to zero within  $\tau = \pm\infty$ . This indeed is a valid concern, and the problem can arise because eq S32 is constructed without considering any dephasing or broadening effects that do exist in nature. Namely, both  $P_\nu$  and  $\delta$  in eq S6 are discrete and they either overlap to form an infinity or do not overlap to form zero. To see how this diverging condition takes place and then how the problem practically goes away, let us start with the construction of  $\rho_{\text{DSO}}$ :<sup>S1</sup>

$$\begin{aligned} \rho_{\text{DSO}} &= \sqrt{\frac{\prod_{\mu} \frac{\omega_{\mu}}{\sin \omega_{\mu} t} \prod_{\mu} \frac{\omega'_{\mu}}{\sin \omega'_{\mu} t'}}{\det \begin{pmatrix} \mathbf{B} & -\mathbf{A} \\ -\mathbf{A} & \mathbf{B} \end{pmatrix}}} \exp \left[ -\frac{i}{\hbar} \left( \frac{1}{2} \mathbf{f}^T \mathbf{K}^{-1} \mathbf{f} - \mathbf{d}^T \mathbf{E} \mathbf{d} \right) \right] \\ &\equiv \sqrt{X} \exp \left[ -\frac{i}{\hbar} \left( \frac{1}{2} \mathbf{f}^T \mathbf{K}^{-1} \mathbf{f} - \mathbf{d}^T \mathbf{E} \mathbf{d} \right) \right] \end{aligned} \quad (\text{S33})$$

If we take an approximation such that the Duschinsky rotation is an identity ( $\mathbf{J} = \mathbf{1}$ ),  $\mathbf{A}$  and  $\mathbf{B}$  become diagonal matrices without any mode-mixing, and after a little math, one can easily show that the prefactor  $X$  in the square root of eq S33 becomes

$$\begin{aligned} X &= \frac{\prod_{\mu} \frac{\omega_{\mu}}{\sin \omega_{\mu} t} \prod_{\mu} \frac{\omega'_{\mu}}{\sin \omega'_{\mu} t'}}{\prod_{\mu} \left[ \left( \frac{\omega_{\mu}}{\tan \omega_{\mu} t} + \frac{\omega'_{\mu}}{\tan \omega'_{\mu} t'} \right)^2 - \left( \frac{\omega_{\mu}}{\sin \omega_{\mu} t} + \frac{\omega'_{\mu}}{\sin \omega'_{\mu} t'} \right)^2 \right]} \\ &= \prod_{\mu} \frac{1}{2 (\cos \omega_{\mu} t \cos \omega'_{\mu} t' - 1) - \left( \frac{\omega_{\mu}}{\omega'_{\mu}} + \frac{\omega'_{\mu}}{\omega_{\mu}} \right) \sin \omega_{\mu} t \sin \omega'_{\mu} t'} \equiv \prod_{\mu} X_{\mu} \end{aligned} \quad (\text{S34})$$

When the pair of vibrational frequencies of the two involved electronic states are close enough as in DABNA, the  $\mu$ -th component becomes

$$X_\mu = \frac{1}{2} \frac{1}{\cos(\omega_\mu t + \omega'_\mu t') - 1} \quad (\text{S35})$$

Substituting  $t' = -t - i\beta\hbar$  and then scaling by a constant such that  $\bar{X}_\mu(t=0) = 1$ , we have

$$\bar{X}_\mu = \frac{\cosh \beta\hbar\omega'_\mu - 1}{\cos[(\omega_\mu - \omega'_\mu)t - i\beta\hbar\omega'_\mu] - 1} \quad (\text{S36})$$

Its oscillating frequency is related to the frequency change  $\omega_\mu \rightarrow \omega'_\mu$ . This explains the slower envelope oscillations shown in Figure S11. From this equation, we can consider two extreme cases in terms of the temperature. (1) In the low temperature limit ( $\beta \rightarrow \infty$ ), because  $\cosh \beta\hbar\omega'_\mu \approx \sinh \beta\hbar\omega'_\mu \gg 1$  holds, one can trivially show that

$$\bar{X}_\mu = \frac{1}{\cos(\omega_\mu - \omega'_\mu)t + i \sin(\omega_\mu - \omega'_\mu)t} \quad (\text{S37})$$

In this case, we can easily anticipate that the oscillation will not decay at all. (2) On the other hand, in the high temperature limit ( $\beta \rightarrow 0$ ),  $\bar{X}_\mu$  of eq S36 behaves quite differently. In this case, in the vicinity of  $t = 0$ ,

$$\bar{X}_\mu \approx -\frac{(\beta\hbar\omega'_\mu)^2}{[(\omega_\mu - \omega'_\mu)t - i\beta\hbar\omega'_\mu]^2} = -\left[\frac{\epsilon}{(\omega_\mu - \omega'_\mu)^2 t^2 + \epsilon^2}\right]^2 [(\omega_\mu - \omega'_\mu)t + i\epsilon]^2 \quad (\text{S38})$$

with  $\epsilon = \beta\hbar\omega'_\mu$ . We can see that the above expression contains a Lorentzian function with a vanishing width  $\epsilon$ , namely  $\epsilon/[(\omega_\mu - \omega'_\mu)^2 t^2 + \epsilon^2]$ . Because the other combining term,  $[(\omega_\mu - \omega'_\mu)t + i\epsilon]^2$ , does not particularly diverge at all, the whole  $\bar{X}_\mu$  starts from 1 at  $t = 0$  and quickly decays to zero as  $t$  increases. Of course, when  $t$  is too large, the expansion becomes invalid and  $\bar{X}_\mu$  will rise back. We will discuss this long-term rising in a later paragraph.

At an intermediate temperature,  $\beta$  will neither be too large nor too small. Then, we can

easily imagine that  $\bar{X}_\mu$  will behave somewhere in between the two extreme cases. Namely, the envelope will oscillate with the frequency  $\omega_\mu - \omega'_\mu$ , and at the same time, decay roughly like a Lorentzian. The decay speed will be related to the temperature with  $\beta\hbar\omega'_\mu$ . When many  $\bar{X}_\mu$  values are multiplied together, the decay from  $\bar{X} = 1$  to 0 will be very prominent. In addition, if we further include the mode mixing with non-identity  $\mathbf{J}$  according to eqs S16 and S17, the contributions by all different modes with different frequencies will be added in forming  $\bar{X}_\mu$ . While it will be non-trivial to show their effects in a simple formula, we can surely anticipate that the added oscillations with different frequencies will suppress the overall oscillations in time. Of course, at  $t = 0$ , all the functions will be in phase, and the amplitude will be large. This is indeed what we observe in Figure S11.

Because there is no dephasing implemented in our equation, the oscillations will rise back again with an inevitable rephasing behavior in the long term. However, that rephasing time will be related to the least common multiple of all  $1/(\omega_\mu - \omega'_\mu)$  values for vibronically participating modes  $\{\mu\}$ . While  $1/\omega_\mu$  is a relatively short time,  $1/(\omega_\mu - \omega'_\mu)$  tends to be quite long with small frequency changes in DABNA, and the time determined by the common multiple involving many modes will be even much longer. If we imagine integrating eq S32 really in  $(-\infty, \infty)$ , it will diverge with the recurring peaks in the time correlation. However, adopting that diverging integral is not physically acceptable, as doing so will be to assume a situation without any dephasing effect. Some dephasing will always happen with real molecules at non-zero temperatures. Therefore, the integration should not be continued any longer than the physically acceptable dephasing time. The only ambiguity will be then the length of dephasing time. To eliminate this ambiguity, we have tested to see how long the time correlation function stays at zero without any rephasing behavior. When  $\bar{\rho}$  was calculated up to 419.4 ps without any approximation at every 0.1 fs step, it essentially stayed at zero up to the time limit we have taken (Figure S12). With the approximation of  $\mathbf{J} = \mathbf{1}$  (eq S34) together with the data in Table S6, we still observed no rephasing behavior with  $\bar{X}$  staying at zero up to 10  $\mu\text{s}$ . In the case of DABNA, the fact that the time correlation

decays to zero earlier than 1 ps and never rises back before 10  $\mu$ s signifies that as long as the dephasing time is longer than 1 ps and shorter than 10  $\mu$ s,  $k_{\text{RISC}}$  will essentially be identical no matter what the actual dephasing time is. Surely, the dephasing time will fall within this wide range that we have tested, and the rate obtained with our integration time limit of  $\sim 6.5$  ps does not bear any dephasing or damping related uncertainty. This surely resolves the mathematical paradox that we mentioned in this section.

Problems with our scheme can happen when the time correlations do not decay even after a reasonable dephasing time, and the recurrence happens earlier than the decay. This happens especially when the temperature is too low ( $\beta \rightarrow \infty$ ), although the frequency changes and the extent of mode mixing can also govern the situation. When the time correlation lasts beyond the system's dephasing time, the  $\delta$ -function is often modified into a Gaussian or a Lorentzian function. This remedy, however, may be an ad hoc treatment as knowing the dephasing time accurately may not be a trivial task. Fortunately for DABNA, we did not have to take that path. More numerical tests regarding the dephasing correction can be found elsewhere (ref S10) based on formulations that are very similar to our equations. We also refer readers to a recent detailed account (ref S11) on how the rate is affected by enforced damping, although the rate formulation in that reference is different especially when cumulant expansions are adopted. In any case, we stress again that  $k_{\text{RISC}}$  was not affected at all unless the dephasing time was assumed to be unphysically short with  $\gamma \ll 1$  ps (Table S9), or equivalently, unless the  $\delta$ -function was distorted into an excessively wide form (Figure S13).

Finally, we note that our mathematical proof of the rate convergence in this section depends on the assumption of  $\mathbf{J} = \mathbf{1}$ , namely the assumption that the vibrations do not change noticeably between  $S_1$  and  $T_1$ . The diagonal dominance of  $\mathbf{J}$  shown in Figure S6a directly supports this assumption. In addition, when we re-calculated  $k_{\text{RISC}}$  displayed in Figure 2a of the main text after assuming  $\mathbf{J} = \mathbf{1}$ , we observed that the rate values remained without any drastic changes as displayed in Figure S14. Therefore, it is not likely that the

convergence property was affected by the approximation.

## 4. Semiclassical quantum dynamics simulations

To demonstrate the vibrational resonance behavior in RISC, we employed the non-Hamiltonian version of the Poisson bracket mapping equation (PBME-nH).<sup>S12</sup> In PBME-nH, the density matrix evolution is followed by trajectory simulations governed by the equations of motion of the quantal and the mass-weighted classical phase space variables ( $\{(r_i, p_i)\}$  and  $(R, P)$ ) respectively, with  $i$  spanning the state space  $\mathbf{X} = \{S_1, T_1, T_3\}$ :

$$\frac{dr_i}{dt} = \frac{dH_m}{dp_i} = \frac{1}{\hbar} \sum_j h^{ij} p_j \quad (\text{S39})$$

$$\frac{dp_i}{dt} = -\frac{\partial H_m}{\partial r_i} = -\frac{1}{\hbar} \sum_j h^{ij} r_j \quad (\text{S40})$$

$$\frac{dR}{dt} = \frac{\partial H_m}{\partial P} = P \quad (\text{S41})$$

$$\frac{dP}{dt} = -\frac{\partial V_b}{\partial R} - \frac{2}{(N+4)\hbar} \sum_{i,j} \frac{\partial h^{ij}}{\partial R} (r_i r_j + p_i p_j) + \frac{N+4}{4(N+4)} \sum_i \frac{\partial h^{ii}}{\partial R} \quad (\text{S42})$$

Details about how the mapping Hamiltonian  $H_m$  is defined can be found in ref S12.

The three state electronic Hamiltonian involving  $\mathbf{X}$  was taken as the minimal model:

$$\hat{H}^{\text{el}} = \sum_{i \in \mathbf{X}} |i\rangle \epsilon_i \langle i| + \sum_{i,j \in \mathbf{X}} |i\rangle V_{ij}^{\text{SOC}} \langle j| \quad (\text{S43})$$

as we observed that they participated most importantly with the golden rule calculations.

$V_{ij}^{\text{SOC}}$  denotes the spin-orbit coupling as listed in Table S7 with  $V_{T_1 T_3}^{\text{SOC}}$  fixed as zero. This is supplemented by the phonon Hamiltonian and the electron-phonon coupling as:

$$\hat{H}^{\text{ph}} = \sum_{i \in \mathbf{X}} \sum_{\xi} \left( \frac{P_{\xi}^2}{2} + \frac{1}{2} \omega_{\xi}^2 R_{\xi}^2 \right) \quad (\text{S44})$$

$$\hat{H}^{\text{el-ph}} = \sum_{i \in \mathbf{X}} \sum_{\xi} |i\rangle c_{i\xi} R_{\xi} \langle i| + C_r R_r (|T_1\rangle \langle T_3| + |T_3\rangle \langle T_1|) \quad (\text{S45})$$



Here, we have explicitly designated the phonon mode index  $\xi$  for both  $P$  and  $R$ . The phonon modes include the intramolecular normal vibrations of the emitter and the surrounding thermal bath motions,<sup>S13</sup> which couple to the state energies through  $c_{i\xi}$ . The coupling strengths of the emitter normal vibrations are listed in Table S8 in the form of the reorganization energies ( $\lambda_\xi = c_{i\xi}^2/2\omega_\xi$ ). If the reorganization energies in the table are summed up for the emitter modes, it will become the emitter-specific reorganization energy  $\lambda_{\text{em}}$ . The thermal bath surrounding the emitter was modeled by a Debye spectral density,  $J(\omega) = 2\lambda_{\text{ph}}\omega\omega_c/(\omega^2 + \omega_c^2)$ , with  $\lambda_{\text{ph}} = 20 \text{ cm}^{-1}$  and  $\omega_c = 600 \text{ cm}^{-1}$ .

In this work, we slightly modified the integration scheme for the bath momentum toward reducing the computational cost by increasing the time step with additionally considering its second derivative:

$$\frac{d^2 P_\xi}{dt^2} \approx -\frac{2}{(N+4)\hbar} \sum_{i,j} \frac{\partial h^{ij}}{\partial R_\xi} \frac{d}{dt} (r_i r_j + p_i p_j) \quad (\text{S46})$$

$$\begin{aligned} &= -\frac{2}{(N+4)\hbar} \sum_{i,j} \frac{\partial h^{ij}}{\partial R_\xi} \left( \frac{1}{\hbar} \sum_k (h^{ik} p_k r_j + r_\lambda h^{jk} p_k) \right) \\ &\quad + \frac{2}{(N+4)\hbar} \sum_{i,j} \frac{\partial h^{i,j}}{\partial R_\xi} \left( \frac{1}{\hbar} \sum_k (h^{ik} r_k p_j + p_i h^{jk} r_k) \right) \end{aligned} \quad (\text{S47})$$

As an additional effort to further reduce the computational cost, we applied the focused sampling strategy<sup>S14,S15</sup> by initially sampling the system variables to follow  $r_i^2 + p_i^2 = 1$  for  $i = \text{T}_1$ , with the other states satisfying  $r_j = p_j = 0$  with  $j = \text{S}_1$  or  $\text{T}_3$ . The bath was assumed to be initially at a thermal equilibrium at  $T = 300 \text{ K}$ , and the classical variables were sampled according to the Wigner distribution:

$$\rho_B(R_\xi, P_\xi) = \frac{1}{\pi\hbar} \tanh \frac{\beta\hbar\omega_\xi}{2} \exp \left( -\frac{\tanh(\beta\hbar\omega_\xi/2)}{\hbar\omega_\xi} (P_\xi^2 + \omega_\xi^2 R_\xi^2) \right) \quad (\text{S48})$$

We simulated 5000 PBME-nH trajectories for getting the RISC rate at each given condition. Each trajectory was propagated for 1 ps with an integration time step of 0.1 fs. The con-

tinuous spectral density was implemented using 1000 discrete bath modes with a maximum frequency,  $\omega_{\max} = 3000 \text{ cm}^{-1}$ . These discrete bath modes recover 98% of the reorganization energy from the continuum bath,  $\lambda_{\text{ph}}$ . Because we did not perform  $T_3$  geometry optimizations, the  $T_1$ - $T_3$  reorganization energy was not known, and we employed the identical vibrational coupling as in the  $T_1$ - $S_1$  pair. Among all the bath modes, we designated that one mode (“ $R_r$ ”) can induce geometry-dependent vibronic coupling between  $T_1$  and  $T_3$ . Because such coupling grows linearly with the displacement from the equilibrium geometry, we adopted a linear coupling coefficient  $C_r$ . Thus, this coupling changes with the emitter geometry and intrinsically bears a non-Condon character. The magnitude of  $C_r$  is dictated by the derivative coupling and the adopted quasi-diabatic scheme.<sup>S16,S17</sup> If we define the quasi-diabatic states as the adiabatic states at the  $T_1$  optimized geometry, the derivative of the diabatic Hamiltonian with respect to the nuclear coordinates is obtained from the derivative coupling.<sup>S18</sup> Then,  $C_r$  can be easily estimated from the projection of the  $T_1$ - $T_3$  derivative coupling vector  $\vec{F}$  onto the normal mode vector of  $R_r$ :

$$C_r = -(E_{T_3} - E_{T_1}) \vec{F}_{T_1 T_3} \cdot \hat{R}_r \quad (\text{S49})$$

with

$$\vec{F}_{T_1 T_3} = -\frac{1}{E_{T_3} - E_{T_1}} \frac{\partial V_{T_1 T_3}}{\partial \vec{X}} \quad (\text{S50})$$

We chose the  $\nu_{106}$  mode at  $\omega = 1279 \text{ cm}^{-1}$  for  $R_r$ . With this,  $C_r = 1.136 \times 10^{-4}$  a.u. was obtained. With the oscillation of  $R_r$  in time, the root-mean-squared value of the  $T_1$ - $T_3$  coupling due to this non-Condon effect, namely  $\sqrt{|C_r R_r|^2}$  in the average sense, was  $\sim 250 \text{ cm}^{-1}$  during the trajectory durations. To emphasize the importance of the fluctuating non-Condon nature of this coupling, we additionally prepared a fictitious model system with  $C_r = 0$  but a relatively strong and non-fluctuating coupling  $V_{T_1 T_3} = 500 \text{ cm}^{-1}$ . This is equivalent to replacing  $C_r R_r$  with  $V_{T_1 T_3}$  in eq S45.

## Supporting Information Tables

Table S1: Normal modes of DABNA with major contributions to  $k_{\text{SV}}$  at different  $\Delta E_{\text{ST}}$  values.

| $\Delta E_{\text{ST}}$ (eV) | $k_{\text{SV}}$ ( $10^4 \text{ s}^{-1}$ ) <sup>a</sup> | dominant normal modes <sup>b</sup>                     |
|-----------------------------|--------------------------------------------------------|--------------------------------------------------------|
| 0.148                       | 1.95 (89%)                                             | $\nu_{106}$ (74.8%, 0.159)                             |
| 0.162                       | 1.38 (97%)                                             | $\nu_{116}$ (60.9%, 0.174), $\nu_{118}$ (23.9%, 0.177) |
| 0.167                       | 2.12 (100%)                                            | $\nu_{118}$ (85.1%, 0.177), $\nu_{116}$ (9.6%, 0.174)  |

<sup>a</sup> Diagonal contribution to total  $k_{\text{SV}}$  of eq S6 ( $\equiv \sum_{\nu} [k_{\text{SV}}]_{\nu\nu} / k_{\text{SV}}$ ) are given in parentheses.

<sup>b</sup> Contributions within the diagonal in percentage and vibrational frequencies in eV units are given in parentheses. The normal mode motions are pictorially represented in Figure S3.

Table S2: Electronic state energies of DABNA from SCS-CC2 and SCS-ADC(2) calculations.<sup>a</sup>

| N  | S <sub>N</sub> (eV) <sup>b</sup> | T <sub>N</sub> (eV) <sup>b</sup> | $\Delta E_{S_N S_1}$ (eV) | $\Delta E_{T_N T_1}$ (eV) |
|----|----------------------------------|----------------------------------|---------------------------|---------------------------|
| 1  | 3.044<br>(3.212)                 | 2.908<br>(3.068)                 |                           |                           |
| 2  | 3.938                            | 3.494                            | 0.894                     | 0.586                     |
| 3  | 4.086                            | 3.637                            | 1.042                     | 0.729                     |
| 4  | 4.370                            | 3.724                            | 1.326                     | 0.816                     |
| 5  | 4.740                            | 3.996                            | 1.696                     | 1.088                     |
| 6  | 4.798                            | 4.078                            | 1.754                     | 1.170                     |
| 7  | 4.818                            | 4.084                            | 1.774                     | 1.176                     |
| 8  | 4.839                            | 4.085                            | 1.795                     | 1.177                     |
| 9  | 4.946                            | 4.304                            | 1.902                     | 1.396                     |
| 10 | 4.949                            | 4.401                            | 1.905                     | 1.493                     |
| 11 | 4.998                            | 4.598                            | 1.954                     | 1.690                     |
| 12 | 5.174                            | 4.740                            | 2.130                     | 1.832                     |
| 13 | 5.246                            | 4.794                            | 2.202                     | 1.886                     |
| 14 | 5.251                            | 4.852                            | 2.207                     | 1.944                     |
| 15 | 5.321                            | 4.879                            | 2.277                     | 1.971                     |
| 16 | 5.684                            | 4.897                            | 2.639                     | 1.989                     |
| 17 | 5.763                            | 4.899                            | 2.718                     | 1.991                     |
| 18 | 5.945                            | 4.903                            | 2.900                     | 1.995                     |
| 19 | 6.036                            | 4.949                            | 2.992                     | 2.041                     |
| 20 | 6.055                            | 5.118                            | 3.010                     | 2.210                     |

<sup>a</sup> Vertical transition energies in reference to the S<sub>0</sub> state energy at the S<sub>1</sub> state equilibrium geometry. First-excited states were obtained with the SCS-CC2 calculations, upon which all other energies were obtained via the excited-state energy gaps with the SCS-ADC(2) calculations. <sup>b</sup> Numbers in parentheses are the SCS-CC2 adiabatic energies obtained with ground and excited state geometry optimizations at the SCS-MP2 and the SCS-ADC(2) levels, respectively.

Table S3: Energy gaps (eV) between excited states estimated with various levels of theory.<sup>a</sup>

| molecule | basis | $\Delta E_{ST}$  |            |         | $\Delta E_{TT}^b$  |                  |            |
|----------|-------|------------------|------------|---------|--------------------|------------------|------------|
|          |       | $\omega^*B97X^c$ | SCS-ADC(2) | SCS-CC2 | expt. <sup>d</sup> | $\omega^*B97X^c$ | SCS-ADC(2) |
| DABNA    | SVP   | 0.372            | 0.130      | 0.145   | 0.15 (EtOH)        | 0.778            | 0.729      |
|          | TZVPP | 0.371            | 0.130      | 0.144   |                    |                  |            |
| TBN-TPA  | SVP   | 0.461            | 0.127      | 0.140   | 0.14 (Toluene)     | 0.719            | 0.660      |
|          | TZVPP | 0.444            | 0.125      | 0.137   |                    |                  |            |
| TABNA    | SVP   | 0.605            | 0.153      | 0.164   |                    | 0.457            | 0.412      |
|          | TZVPP | 0.574            | 0.152      | 0.161   |                    |                  |            |

<sup>a</sup> Optimized structures from the SCS-ADC(2)/SVP level of theory are used. <sup>b</sup> T<sub>1</sub>/T<sub>3</sub> energy gaps. See the main text for details. <sup>c</sup> Optimal  $\omega$ -values are: 0.147 (DABNA), 0.113 (TBN-TPA), 0.138 (TABNA). <sup>d</sup> Literature values measured in solution phase.

Table S4: Root-mean-squared deviations in Å between S<sub>1</sub> and T<sub>1</sub> geometries for various emitters based on multiple-resonance and donor–acceptor structures.

| emitter                | type | rmsd  |
|------------------------|------|-------|
| DABNA                  | MR   | 0.010 |
| TBN-TPA                | MR   | 0.036 |
| TABNA                  | MR   | 0.047 |
| PTZ-DBTO2 <sup>a</sup> | DA   | 0.078 |
| 4CzPN <sup>b</sup>     | DA   | 0.540 |
| 4CzIPN <sup>b</sup>    | DA   | 0.542 |
| 4CzTPN <sup>b</sup>    | DA   | 0.591 |
| Cz-4-PN <sup>b</sup>   | DA   | 0.728 |
| Cz-3-PN <sup>b</sup>   | DA   | 0.784 |
| 3CzPN <sup>b</sup>     | DA   | 0.929 |
| 2CzPN <sup>b</sup>     | DA   | 0.972 |

Optimized geometries were obtained at: <sup>a</sup> the SCS-ADC(2)/def2-TZVPP (ref S1) or <sup>b</sup> the  $\omega$ \*B97X/6-31G(d) level of theory (ref S19).

Table S5: Optimized geometries of the  $S_1$  and the  $T_1$  states obtained at the SCS-ADC(2)/SVP level of theory in Cartesian coordinates (Å).

| atom | $S_1$ state |           |           | $T_1$ state |           |           |
|------|-------------|-----------|-----------|-------------|-----------|-----------|
|      | X           | Y         | Z         | X           | Y         | Z         |
|      | DABNA       |           |           |             |           |           |
| C    | -4.036178   | 3.091585  | 0.466263  | -4.039219   | 3.088518  | 0.453151  |
| C    | -3.860253   | 1.716610  | 0.237155  | -3.861540   | 1.717316  | 0.230237  |
| C    | -2.562148   | 1.170277  | 0.145986  | -2.561838   | 1.169612  | 0.140326  |
| C    | -1.391760   | 2.004555  | 0.200344  | -1.391468   | 2.003819  | 0.190524  |
| C    | -1.623804   | 3.373689  | 0.489476  | -1.626830   | 3.376035  | 0.475717  |
| C    | -2.913777   | 3.915704  | 0.604449  | -2.913000   | 3.914023  | 0.587989  |
| B    | 0.000014    | 1.346646  | 0.000150  | 0.000007    | 1.345652  | -0.000265 |
| C    | 0.000006    | -0.178961 | 0.000078  | -0.000002   | -0.174089 | -0.000102 |
| C    | 1.391796    | 2.004559  | -0.199982 | 1.391497    | 2.003770  | -0.191131 |
| C    | -1.210883   | -0.919105 | -0.010784 | -1.211394   | -0.918018 | -0.009332 |
| C    | -1.213321   | -2.343607 | -0.019005 | -1.211325   | -2.337916 | -0.016358 |
| C    | -0.000005   | -3.047966 | -0.000074 | -0.000023   | -3.046089 | 0.000233  |
| C    | 1.213314    | -2.343620 | 0.018938  | 1.211288    | -2.337931 | 0.016663  |
| C    | 1.210889    | -0.919117 | 0.010860  | 1.211378    | -0.918034 | 0.009294  |
| C    | 2.562179    | 1.170270  | -0.145657 | 2.561847    | 1.169539  | -0.140910 |
| C    | 3.860275    | 1.716553  | -0.237245 | 3.861574    | 1.717260  | -0.230367 |
| C    | 4.036179    | 3.091429  | -0.466962 | 4.039309    | 3.088659  | -0.452015 |
| C    | 2.913767    | 3.915568  | -0.604935 | 2.913123    | 3.914036  | -0.587903 |
| C    | 1.623807    | 3.373616  | -0.489504 | 1.626924    | 3.376044  | -0.475988 |
| N    | -2.425813   | -0.228674 | -0.017226 | -2.428403   | -0.228969 | -0.017301 |
| N    | 2.425825    | -0.228697 | 0.017403  | 2.428396    | -0.229003 | 0.017056  |
| C    | -3.628012   | -1.006432 | -0.108370 | -3.630369   | -1.007658 | -0.105706 |
| C    | 3.628014    | -1.006477 | 0.108493  | 3.630355    | -1.007688 | 0.105608  |
| C    | 4.164225    | -1.297517 | 1.369778  | 4.168162    | -1.300206 | 1.365813  |
| C    | 5.332776    | -2.065091 | 1.459697  | 5.337198    | -2.067263 | 1.453236  |
| C    | 5.958704    | -2.534110 | 0.295730  | 5.961725    | -2.534640 | 0.287867  |
| C    | 5.415847    | -2.235176 | -0.963027 | 5.416996    | -2.234604 | -0.969733 |
| C    | 4.248313    | -1.468492 | -1.061067 | 4.248500    | -1.469011 | -1.065244 |
| C    | -4.248266   | -1.468602 | 1.061152  | -4.248558   | -1.468695 | 1.065236  |
| C    | -5.415827   | -2.235238 | 0.963059  | -5.417094   | -2.234247 | 0.969871  |
| C    | -5.958738   | -2.533998 | -0.295715 | -5.961828   | -2.534511 | -0.287672 |
| C    | -5.332850   | -2.064832 | -1.459646 | -5.337237   | -2.067448 | -1.453133 |
| C    | -4.164283   | -1.297291 | -1.369672 | -4.168151   | -1.300450 | -1.365858 |
| H    | -5.047375   | 3.502313  | 0.537425  | -5.049814   | 3.500152  | 0.524525  |
| H    | -4.739628   | 1.077334  | 0.154609  | -4.739503   | 1.075751  | 0.150254  |
| H    | -0.765194   | 4.033423  | 0.627416  | -0.769818   | 4.037474  | 0.613517  |
| H    | -3.037671   | 4.983336  | 0.810958  | -3.038214   | 4.982136  | 0.791683  |
| H    | -2.152894   | -2.896526 | -0.038498 | -2.151796   | -2.889859 | -0.034359 |
| H    | -0.000010   | -4.140669 | -0.000123 | -0.000031   | -4.138403 | 0.000358  |
| H    | 2.152882    | -2.896550 | 0.038366  | 2.151751    | -2.889884 | 0.034793  |
| H    | 4.739658    | 1.077322  | -0.154437 | 4.739498    | 1.075493  | -0.151586 |
| H    | 5.047368    | 3.502042  | -0.538903 | 5.049927    | 3.500670  | -0.520851 |
| H    | 3.037639    | 4.983190  | -0.811509 | 3.038381    | 4.981929  | -0.792721 |
| H    | 0.765180    | 4.033333  | -0.627421 | 0.769945    | 4.037573  | -0.613569 |
| H    | 3.661602    | -0.918625 | 2.263690  | 3.666988    | -0.922157 | 2.260863  |
| H    | 5.756419    | -2.296300 | 2.440899  | 5.761861    | -2.300023 | 2.433604  |
| H    | 6.870748    | -3.132532 | 0.369051  | 6.874153    | -3.132686 | 0.359252  |
| H    | 5.904434    | -2.599341 | -1.871012 | 5.904674    | -2.597139 | -1.878828 |
| H    | 3.810734    | -1.220353 | -2.031873 | 3.808885    | -1.220884 | -2.035108 |
| H    | -3.810625   | -1.220626 | 2.031973  | -3.808941   | -1.220390 | 2.035053  |
| H    | -5.904394   | -2.599501 | 1.871016  | -5.904793   | -2.596581 | 1.879035  |
| H    | -6.870789   | -3.132403 | -0.369079 | -6.874318   | -3.132476 | -0.358941 |
| H    | -5.756541   | -2.295897 | -2.440861 | -5.761891   | -2.300404 | -2.433458 |
| H    | -3.661692   | -0.918287 | -2.263554 | -3.666904   | -0.922679 | -2.260984 |
|      | TBN-TPA     |           |           |             |           |           |
| C    | 5.205880    | -3.749045 | -1.025425 | 5.203962    | -3.747109 | -1.040369 |
| C    | 3.824768    | -3.654225 | -0.809870 | 3.826710    | -3.650769 | -0.829166 |
| C    | 3.227787    | -2.405530 | -0.539167 | 3.228272    | -2.402746 | -0.551478 |
| C    | 4.031426    | -1.222860 | -0.391065 | 4.030955    | -1.219000 | -0.393657 |
| C    | 5.413512    | -1.371053 | -0.673446 | 5.416636    | -1.369297 | -0.676313 |
| C    | 6.027631    | -2.604894 | -0.973593 | 6.026325    | -2.597479 | -0.980337 |
| B    | 3.330698    | 0.105483  | 0.014934  | 3.331779    | 0.105942  | 0.012484  |
| C    | 1.808077    | 0.052375  | 0.004252  | 1.810344    | 0.052450  | 0.002320  |
| C    | 3.932512    | 1.480807  | 0.426042  | 3.931749    | 1.477318  | 0.425212  |
| C    | 1.102377    | -1.159715 | -0.214114 | 1.104478    | -1.159096 | -0.221924 |

|   |           |           |           |           |           |           |
|---|-----------|-----------|-----------|-----------|-----------|-----------|
| C | -0.315823 | -1.202015 | -0.286908 | -0.309495 | -1.200234 | -0.291506 |
| C | -1.065078 | -0.042969 | -0.010799 | -1.058784 | -0.043773 | -0.011941 |
| C | -0.394829 | 1.160643  | 0.277205  | -0.389055 | 1.157945  | 0.278784  |
| C | 1.021685  | 1.216663  | 0.200354  | 1.023180  | 1.215440  | 0.206820  |
| C | 3.049411  | 2.608957  | 0.544310  | 3.048754  | 2.605981  | 0.556316  |
| C | 3.555149  | 3.898453  | 0.808150  | 3.555146  | 3.894481  | 0.830637  |
| C | 4.921958  | 4.088286  | 1.050090  | 4.918064  | 4.085782  | 1.068076  |
| C | 5.818686  | 3.000583  | 1.031794  | 5.816696  | 2.993155  | 1.037766  |
| C | 5.295181  | 1.724602  | 0.735279  | 5.297949  | 1.723571  | 0.734751  |
| N | 1.827923  | -2.340267 | -0.391275 | 1.829475  | -2.341038 | -0.405502 |
| N | 1.661588  | 2.447102  | 0.371150  | 1.661690  | 2.447327  | 0.384781  |
| N | 1.070300  | -3.557185 | -0.417391 | 1.071082  | -3.557681 | -0.433532 |
| C | 0.814116  | 3.603257  | 0.350415  | 0.813054  | 3.603028  | 0.368220  |
| C | 0.391308  | 4.114182  | -0.881069 | 0.398649  | 4.123504  | -0.861993 |
| C | -0.550186 | 5.151881  | -0.920630 | -0.545812 | 5.158472  | -0.899910 |
| C | -1.089356 | 5.696252  | 0.260497  | -1.096565 | 5.690210  | 0.281598  |
| C | -0.613797 | 5.187489  | 1.489829  | -0.628971 | 5.172454  | 1.510098  |
| C | 0.325544  | 4.153874  | 1.543640  | 0.313351  | 4.141338  | 1.562248  |
| C | 0.638121  | -4.102535 | -1.630223 | 0.627984  | -4.094447 | -1.646080 |
| C | -0.182676 | -5.239300 | -1.628659 | -0.196233 | -5.228854 | -1.644819 |
| C | -0.588499 | -5.850783 | -0.426457 | -0.594938 | -5.845743 | -0.443122 |
| C | -0.115949 | -5.292198 | 0.781455  | -0.110324 | -5.296449 | -0.764251 |
| C | 0.701943  | -4.159194 | 0.794160  | 0.710888  | -4.165956 | 0.777252  |
| C | 7.526544  | -2.739519 | -1.258611 | 7.524584  | -2.732928 | -1.266082 |
| C | 7.298943  | 3.239031  | 1.345163  | 7.296314  | 3.232515  | 1.351333  |
| C | 8.131502  | 1.952714  | 1.251295  | 8.132867  | 1.949758  | 1.247858  |
| C | 7.427337  | 3.797318  | 2.775614  | 7.423334  | 3.781412  | 2.785638  |
| C | 7.873846  | 4.256167  | 0.340522  | 7.866280  | 4.258557  | 0.352798  |
| C | 8.269817  | -1.403023 | -1.124703 | 8.270720  | -1.398560 | -1.129101 |
| C | 7.720729  | -3.261789 | -2.695230 | 7.716468  | -3.252132 | -2.704221 |
| C | 8.147140  | -3.734792 | -0.259302 | 8.142479  | -3.732268 | -0.269001 |
| C | -1.514691 | -7.070371 | -0.380621 | -1.526819 | -7.060993 | -0.396778 |
| C | -0.779871 | -8.241917 | 0.297778  | -0.792601 | -8.240104 | 0.269016  |
| C | -1.952437 | -7.518471 | -1.782067 | -1.978054 | -7.498759 | -1.797203 |
| C | -2.775976 | -6.708914 | 0.427602  | -2.779727 | -6.697643 | 0.423668  |
| C | -2.175582 | 6.776477  | 0.259891  | -2.188021 | 6.765211  | 0.281438  |
| C | -3.432195 | 6.209994  | 0.949948  | -3.448611 | 6.185094  | 0.952661  |
| C | -2.561462 | 7.206893  | -1.162275 | -2.561865 | 7.208750  | -1.139918 |
| C | -1.671405 | 8.015065  | 1.023745  | -1.697854 | 7.998124  | 1.063338  |
| C | -3.313509 | 0.861783  | -0.609314 | -3.307941 | 0.849440  | -0.627121 |
| C | -4.665238 | 0.503162  | -0.369425 | -4.660609 | 0.497351  | -0.380403 |
| C | -4.638293 | -0.727277 | 0.395153  | -4.634253 | -0.721268 | 0.402722  |
| C | -3.271498 | -1.047772 | 0.602268  | -3.266888 | -1.036608 | 0.616626  |
| C | -5.648729 | -1.549096 | 0.930925  | -5.643707 | -1.537097 | 0.949789  |
| C | -5.310535 | -2.690317 | 1.669682  | -5.304136 | -2.667602 | 1.704253  |
| C | -3.929595 | -2.976855 | 1.867157  | -3.922767 | -2.949225 | 1.907279  |
| C | -2.905488 | -2.181445 | 1.352532  | -2.899639 | -2.159889 | 1.381888  |
| C | -2.997859 | 2.007204  | -1.364751 | -2.989974 | 1.984805  | -1.396804 |
| C | -4.055847 | 2.777279  | -1.848782 | -4.046321 | 2.750189  | -1.891319 |
| C | -5.423125 | 2.452847  | -1.617122 | -5.414343 | 2.431960  | -1.654199 |
| C | -5.710933 | 1.299120  | -0.876068 | -5.704613 | 1.288702  | -0.898017 |
| C | -6.359247 | -3.629225 | 2.278400  | -6.351632 | -3.600627 | 2.324071  |
| C | -6.175655 | -5.045029 | 1.699959  | -6.164391 | -5.023530 | 1.764368  |
| N | -2.476207 | -0.081955 | -0.014505 | -2.472006 | -0.083008 | -0.016206 |
| N | -7.791887 | -3.168979 | 1.974222  | -7.784909 | -3.147613 | 2.012121  |
| C | -6.182097 | -3.671119 | 3.808214  | -6.176594 | -3.622270 | 3.854549  |
| C | -6.512059 | 3.364027  | -2.196817 | -6.501260 | 3.338866  | -2.244337 |
| C | -7.923319 | 2.869323  | -1.849740 | -7.913671 | 2.851935  | -1.890993 |
| C | -6.380132 | 3.405480  | -3.731239 | -6.370155 | 3.362225  | -3.779207 |
| C | -6.348074 | 4.785978  | -1.627604 | -6.333511 | 4.766975  | -1.691735 |
| H | 5.631272  | -4.733850 | -1.237120 | 5.630813  | -4.729950 | -1.256328 |
| H | 3.215115  | -4.556723 | -0.875817 | 3.214823  | -4.551237 | -0.902860 |
| H | 6.025701  | -0.471730 | -0.646628 | 6.030105  | -0.471202 | -0.646391 |
| H | -0.839563 | -2.119729 | -0.551877 | -0.834329 | -2.118852 | -0.552117 |
| H | -0.981134 | 2.040426  | 0.539150  | -0.977027 | 2.038310  | 0.535916  |
| H | 2.884149  | 4.758226  | 0.846912  | 2.881388  | 4.751640  | 0.879889  |
| H | 5.276788  | 5.101942  | 1.255492  | 5.273759  | 5.097196  | 1.280919  |
| H | 5.966889  | 0.868353  | 0.732706  | 5.971400  | 0.869006  | 0.726786  |
| H | 0.788158  | 3.680311  | -1.803562 | 0.803624  | 3.698673  | -1.785117 |
| H | -0.870506 | 5.520072  | -1.896545 | -0.860201 | 5.533661  | -1.875031 |
| H | -0.999174 | 5.588209  | 2.431002  | -1.023626 | 5.563103  | 2.451629  |
| H | 0.663570  | 3.748706  | 2.501684  | 0.644783  | 3.728567  | 2.519341  |
| H | 0.932112  | -3.624835 | -2.569196 | 0.915331  | -3.611541 | -2.584434 |
| H | -0.515238 | -5.634958 | -2.589506 | -0.538004 | -5.617450 | -2.605292 |



|   |           |           |           |           |           |           |
|---|-----------|-----------|-----------|-----------|-----------|-----------|
| H | -0.396421 | -5.742016 | 1.737530  | -0.385094 | -5.750766 | 1.719802  |
| H | 1.053959  | -3.726824 | 1.735281  | 1.070566  | -3.739649 | 1.718198  |
| H | 8.092832  | 1.520687  | 0.239951  | 8.094487  | 1.524595  | 0.233652  |
| H | 9.185307  | 2.178528  | 1.482099  | 9.186048  | 2.177815  | 1.479081  |
| H | 7.785670  | 1.191270  | 1.967411  | 7.790416  | 1.182454  | 1.959253  |
| H | 6.895830  | 4.754780  | 2.885182  | 6.889749  | 4.736730  | 2.902445  |
| H | 7.005530  | 3.088447  | 3.506011  | 7.004003  | 3.066195  | 3.511231  |
| H | 8.488132  | 3.965111  | 3.027933  | 8.483906  | 3.949775  | 3.038015  |
| H | 7.359858  | 5.227027  | 0.403834  | 7.350346  | 5.227733  | 0.423760  |
| H | 8.945326  | 4.426417  | 0.540161  | 8.937570  | 4.429551  | 0.552169  |
| H | 7.769359  | 3.882042  | -0.690557 | 7.761252  | 3.891362  | -0.680708 |
| H | 8.180372  | -0.992686 | -0.107521 | 8.182824  | -0.990814 | -0.110808 |
| H | 9.341068  | -1.554710 | -1.334928 | 9.341404  | -1.552372 | -1.340413 |
| H | 7.890091  | -0.653315 | -1.835999 | 7.892243  | -0.646275 | -1.838270 |
| H | 7.255588  | -4.249785 | -2.832300 | 7.250294  | -4.239149 | -2.843864 |
| H | 7.268104  | -2.568782 | -3.422393 | 7.264608  | -2.556461 | -3.429285 |
| H | 8.795198  | -3.355146 | -2.927463 | 8.790706  | -3.345959 | -2.936773 |
| H | 7.700621  | -4.736316 | -0.350436 | 7.694658  | -4.732845 | -0.362915 |
| H | 9.231464  | -3.829854 | -0.438481 | 9.226605  | -3.828120 | -0.448254 |
| H | 7.996776  | -3.387690 | 0.775553  | 7.992460  | -3.387522 | 0.766685  |
| H | -0.487907 | -7.995724 | 1.330079  | -0.491061 | -8.001283 | 1.300297  |
| H | -1.431060 | -9.130842 | 0.333545  | -1.448067 | -9.125851 | 0.305069  |
| H | 0.132837  | -8.504469 | -0.260750 | 0.114191  | -8.504200 | -0.298370 |
| H | -2.506743 | -6.724573 | -2.306456 | -2.532436 | -6.699022 | -2.312545 |
| H | -1.091656 | -7.813495 | -2.402213 | -1.123807 | -7.794635 | -2.425940 |
| H | -2.617977 | -8.391833 | -1.696576 | -2.647398 | -8.369166 | -1.711365 |
| H | -3.289880 | -5.841571 | -0.016238 | -3.292902 | -5.825169 | -0.010895 |
| H | -3.477589 | -7.559418 | 0.441896  | -3.485451 | -7.544711 | 0.438777  |
| H | -2.531345 | -6.457621 | 1.471174  | -2.525541 | -6.453477 | 1.466624  |
| H | -3.234134 | 5.945474  | 1.999970  | -3.259533 | 5.909458  | 2.001492  |
| H | -4.244371 | 6.955793  | 0.935923  | -4.264037 | 6.927335  | 0.939153  |
| H | -3.783321 | 5.304523  | 0.429750  | -3.790489 | 5.284037  | 0.418755  |
| H | -1.703618 | 7.631290  | -1.707111 | -1.700497 | 7.642155  | -1.671983 |
| H | -2.963322 | 6.362035  | -1.742988 | -2.954913 | 6.368458  | -1.733146 |
| H | -3.344098 | 7.980299  | -1.112373 | -3.347998 | 7.978559  | -1.089532 |
| H | -0.762576 | 8.420739  | 0.551014  | -0.786268 | 8.413204  | 0.604253  |
| H | -2.442649 | 8.802797  | 1.022693  | -2.472958 | 8.782034  | 1.062515  |
| H | -1.433676 | 7.778859  | 2.072043  | -1.469773 | 7.752246  | 2.111552  |
| H | -6.692239 | -1.277088 | 0.759566  | -6.687635 | -1.269885 | 0.773278  |
| H | -3.643957 | -3.857353 | 2.449551  | -3.636561 | -3.821350 | 2.501953  |
| H | -1.860313 | -2.436470 | 1.540343  | -1.853725 | -2.409859 | 1.573134  |
| H | -1.965471 | 2.290434  | -1.579672 | -1.956495 | 2.262093  | -1.615014 |
| H | -3.808727 | 3.665312  | -2.437846 | -3.797811 | 3.630092  | -2.491949 |
| H | -6.741978 | 0.998220  | -0.679400 | -6.736377 | 0.993635  | -0.696156 |
| H | -5.181102 | -5.453602 | 1.933637  | -5.169057 | -5.426786 | 2.004144  |
| H | -6.930990 | -5.731950 | 2.117511  | -6.918545 | -5.706750 | 2.190127  |
| H | -6.287481 | -5.032548 | 0.603713  | -6.275205 | -5.025497 | 0.667950  |
| H | -7.992718 | -2.169341 | 2.389868  | -7.988310 | -2.142945 | 2.414161  |
| H | -7.986844 | -3.141949 | 0.890853  | -7.978553 | -3.135318 | 0.928253  |
| H | -8.509491 | -3.871492 | 2.427510  | -8.501621 | -3.845575 | 2.473835  |
| H | -6.294419 | -2.663082 | 4.238432  | -6.291928 | -2.608957 | 4.271371  |
| H | -6.940216 | -4.329431 | 4.264820  | -6.933755 | -4.276414 | 4.318742  |
| H | -5.189448 | -4.052422 | 4.092285  | -5.183398 | -3.997331 | 4.144930  |
| H | -8.084734 | 2.838441  | -0.760958 | -8.074867 | 2.834613  | -0.801885 |
| H | -8.671162 | 3.553596  | -2.281530 | -8.659999 | 3.532732  | -2.330889 |
| H | -8.112054 | 1.864758  | -2.259044 | -8.104866 | 1.842899  | -2.287970 |
| H | -5.405438 | 3.809637  | -4.044588 | -5.394609 | 3.760163  | -4.097790 |
| H | -6.480222 | 2.393640  | -4.155481 | -6.473025 | 2.345745  | -4.191526 |
| H | -7.166761 | 4.043834  | -4.167531 | -7.155413 | 3.997445  | -4.222551 |
| H | -5.372259 | 5.220291  | -1.892906 | -5.356178 | 5.195226  | -1.961468 |
| H | -7.132899 | 5.451783  | -2.024458 | -7.116163 | 5.430524  | -2.096659 |
| H | -6.426441 | 4.774899  | -0.528581 | -6.412433 | 4.768799  | -0.592693 |
|   |           |           | TABNA     |           |           |           |
| C | -2.056272 | 3.744545  | -0.079795 | -2.032107 | 3.730135  | -0.130047 |
| C | -2.801176 | 2.543014  | -0.015979 | -2.792749 | 2.536239  | -0.048015 |
| C | -2.117953 | 1.301199  | 0.098656  | -2.132234 | 1.303579  | 0.087376  |
| C | -0.708907 | 1.290985  | 0.261681  | -0.721441 | 1.304985  | 0.230701  |
| C | 0.038843  | 2.485602  | 0.099463  | 0.034680  | 2.498635  | 0.072514  |
| C | -0.642623 | 3.728390  | -0.015386 | -0.632007 | 3.734345  | -0.064801 |
| B | 0.000623  | -0.001145 | 0.440491  | -0.006157 | 0.000502  | 0.407045  |
| C | -0.770863 | -1.279580 | 0.251056  | -0.776561 | -1.272377 | 0.231078  |
| C | 1.493441  | -0.036116 | 0.252043  | 1.474057  | -0.031272 | 0.242737  |
| C | -2.176393 | -1.214557 | 0.076949  | -2.185291 | -1.210417 | 0.087178  |
| C | -2.912472 | -2.404870 | -0.090516 | -2.897638 | -2.414348 | -0.049754 |

|   |           |           |           |           |           |           |
|---|-----------|-----------|-----------|-----------|-----------|-----------|
| C | -2.204803 | -3.620765 | -0.158818 | -2.189234 | -3.639998 | -0.132882 |
| C | -0.803084 | -3.688051 | -0.058274 | -0.790684 | -3.703473 | -0.067535 |
| C | -0.064633 | -2.493993 | 0.101244  | -0.072346 | -2.496799 | 0.072005  |
| C | 2.139218  | -1.283766 | 0.102237  | 2.129628  | -1.274848 | 0.080371  |
| C | 3.543219  | -1.301308 | -0.056352 | 3.539445  | -1.304759 | -0.061861 |
| C | 4.238830  | -0.082405 | -0.155804 | 4.257042  | -0.092007 | -0.136078 |
| C | 3.592529  | 1.167268  | -0.087872 | 3.590658  | 1.151649  | -0.062001 |
| C | 2.193020  | 1.184862  | 0.078662  | 2.181398  | 1.183081  | 0.080650  |
| N | -2.798692 | 0.064770  | 0.116289  | -2.815631 | 0.060158  | 0.148308  |
| N | 1.355847  | -2.469048 | 0.178012  | 1.352000  | -2.455456 | 0.112918  |
| C | -4.227567 | 0.096669  | 0.014341  | -4.239457 | 0.090405  | 0.041547  |
| C | 2.040704  | -3.716253 | 0.062867  | 2.043445  | -3.706904 | 0.026349  |
| C | 2.332623  | -4.246873 | -1.204744 | 2.340159  | -4.254711 | -1.230496 |
| C | 3.004645  | -5.470936 | -1.309892 | 3.016766  | -5.478478 | -1.306218 |
| C | 3.385703  | -6.166517 | -0.152677 | 3.391686  | -6.149574 | -0.132789 |
| C | 3.093233  | -5.634913 | 1.111404  | 3.089343  | -5.596120 | 1.119701  |
| C | 2.421057  | -4.410299 | 1.221442  | 2.412669  | -4.372269 | 1.203480  |
| C | -4.835525 | 0.151299  | -1.248503 | -4.850853 | 0.105128  | -1.222697 |
| C | -6.232710 | 0.182362  | -1.339179 | -6.247607 | 0.134538  | -1.319959 |
| C | -7.014734 | 0.156769  | -0.174853 | -7.034006 | 0.149530  | -0.158366 |
| C | -6.398677 | 0.100390  | 1.083717  | -6.420613 | 0.135161  | 1.102502  |
| C | -5.001569 | 0.069913  | 1.182628  | -5.023503 | 0.105544  | 1.204870  |
| N | 1.447361  | 2.396498  | 0.117851  | 1.455886  | 2.395862  | 0.113272  |
| C | 2.187014  | 3.619485  | 0.016537  | 2.200494  | 3.616257  | 0.026282  |
| C | 2.468172  | 4.161747  | -1.246086 | 2.517707  | 4.152381  | -1.230597 |
| C | 3.191468  | 5.357576  | -1.336152 | 3.246610  | 5.345762  | -1.306686 |
| C | 3.631162  | 6.004089  | -0.171431 | 3.653029  | 5.998668  | -0.133528 |
| C | 3.347253  | 5.453924  | 1.086910  | 3.329790  | 5.457434  | 1.119122  |
| C | 2.623633  | 4.258384  | 1.185212  | 2.600960  | 4.263958  | 1.203149  |
| H | -2.580909 | 4.700198  | -0.156821 | -2.561315 | 4.681701  | -0.237609 |
| H | -3.889753 | 2.581864  | -0.095099 | -3.880941 | 2.591331  | -0.123100 |
| H | -0.091420 | 4.667906  | -0.094314 | -0.085866 | 4.675070  | -0.156007 |
| H | -3.998044 | -2.400807 | -0.203317 | -3.987198 | -2.422309 | -0.125121 |
| H | -2.767591 | -4.550568 | -0.286894 | -2.758858 | -4.567750 | -0.241437 |
| H | -0.305655 | -4.657233 | -0.134804 | -0.284380 | -4.666103 | -0.159944 |
| H | 4.094110  | -2.241111 | -0.133155 | 4.075579  | -2.252081 | -0.151664 |
| H | 5.325591  | -0.106479 | -0.282366 | 5.344970  | -0.114428 | -0.236283 |
| H | 4.171754  | 2.085434  | -0.200410 | 4.167343  | 2.074807  | -0.152360 |
| H | 2.027516  | -3.690299 | -2.095307 | 2.035926  | -3.716681 | -2.132412 |
| H | 3.232235  | -5.884144 | -2.296746 | 3.251066  | -5.910373 | -2.283151 |
| H | 3.910300  | -7.122329 | -0.236585 | 3.919324  | -7.105156 | -0.194907 |
| H | 3.389675  | -6.175985 | 2.014526  | 3.380179  | -6.119655 | 2.034603  |
| H | 2.183411  | -3.978020 | 2.197066  | 2.164395  | -3.923755 | 2.169018  |
| H | -4.207212 | 0.166462  | -2.143208 | -4.221023 | 0.093566  | -2.116563 |
| H | -6.712754 | 0.225100  | -2.320816 | -6.724734 | 0.145772  | -2.304114 |
| H | -8.105346 | 0.179929  | -0.248773 | -8.124507 | 0.172337  | -0.236268 |
| H | -7.008010 | 0.079532  | 1.991488  | -7.032479 | 0.147238  | 2.008969  |
| H | -4.499956 | 0.024505  | 2.152906  | -4.525022 | 0.093833  | 2.177806  |
| H | 2.119444  | 3.639382  | -2.141089 | 2.188100  | 3.629321  | -2.132402 |
| H | 3.413922  | 5.785506  | -2.317613 | 3.497149  | 5.768185  | -2.283742 |
| H | 4.196077  | 6.937311  | -0.244858 | 4.221530  | 6.930507  | -0.195924 |
| H | 3.690679  | 5.957141  | 1.994981  | 3.644941  | 5.966973  | 2.033882  |
| H | 2.392436  | 3.810451  | 2.155274  | 2.335649  | 3.825572  | 2.168815  |

Table S6: Harmonic vibrational frequencies ( $\text{cm}^{-1}$ ) of the  $S_1$  and the  $T_1$  states calculated at the SCS-ADC(2)/SVP level of theory.<sup>a</sup>

| mode    | $S_1$ | $T_1$ | mode | $S_1$ | $T_1$ | mode | $S_1$  | $T_1$  | mode | $S_1$  | $T_1$  |
|---------|-------|-------|------|-------|-------|------|--------|--------|------|--------|--------|
| DABNA   |       |       |      |       |       |      |        |        |      |        |        |
| 1       | 13.6  | 14.7  | 40   | 547.0 | 546.6 | 79   | 983.6  | 983.5  | 118  | 1426.0 | 1325.4 |
| 2       | 20.3  | 20.4  | 41   | 549.5 | 547.8 | 80   | 984.3  | 984.3  | 119  | 1430.1 | 1425.4 |
| 3       | 38.5  | 39.9  | 42   | 586.8 | 584.9 | 81   | 1008.3 | 1008.2 | 120  | 1440.5 | 1440.6 |
| 4       | 42.1  | 42.9  | 43   | 599.2 | 603.0 | 82   | 1012.6 | 1012.8 | 121  | 1440.6 | 1440.7 |
| 5       | 50.2  | 50.3  | 44   | 608.0 | 608.0 | 83   | 1022.5 | 1023.7 | 122  | 1460.4 | 1460.9 |
| 6       | 61.1  | 62.9  | 45   | 610.8 | 613.5 | 84   | 1030.4 | 1033.2 | 123  | 1469.4 | 1455.6 |
| 7       | 68.8  | 68.9  | 46   | 612.3 | 611.8 | 85   | 1041.0 | 1043.4 | 124  | 1488.9 | 1489.4 |
| 8       | 72.6  | 72.3  | 47   | 617.8 | 610.3 | 86   | 1058.8 | 1058.9 | 125  | 1492.0 | 1485.0 |
| 9       | 82.8  | 82.4  | 48   | 622.1 | 623.5 | 87   | 1058.8 | 1058.9 | 126  | 1493.8 | 1509.0 |
| 10      | 116.4 | 116.5 | 49   | 635.8 | 633.6 | 88   | 1061.4 | 1065.8 | 127  | 1522.7 | 1503.0 |
| 11      | 163.0 | 165.2 | 50   | 636.1 | 634.0 | 89   | 1079.1 | 1081.1 | 128  | 1549.5 | 1525.0 |
| 12      | 165.6 | 166.9 | 51   | 663.8 | 663.6 | 90   | 1093.7 | 1097.8 | 129  | 1554.1 | 1539.3 |
| 13      | 189.5 | 189.5 | 52   | 698.6 | 700.7 | 91   | 1127.8 | 1133.5 | 130  | 1555.7 | 1559.4 |
| 14      | 195.9 | 198.7 | 53   | 700.8 | 702.8 | 92   | 1134.8 | 1074.9 | 131  | 1576.6 | 1582.1 |
| 15      | 201.2 | 201.4 | 54   | 705.2 | 706.6 | 93   | 1135.4 | 1135.5 | 132  | 1599.6 | 1599.8 |
| 16      | 219.9 | 221.5 | 55   | 707.5 | 704.1 | 94   | 1135.4 | 1135.5 | 133  | 1599.8 | 1600.0 |
| 17      | 232.2 | 231.1 | 56   | 724.2 | 724.9 | 95   | 1138.7 | 1137.4 | 134  | 1610.0 | 1608.9 |
| 18      | 233.5 | 234.4 | 57   | 742.3 | 739.1 | 96   | 1139.3 | 1127.7 | 135  | 1610.4 | 1610.9 |
| 19      | 253.0 | 253.5 | 58   | 794.4 | 798.0 | 97   | 1144.0 | 1144.4 | 136  | 3098.0 | 3098.4 |
| 20      | 266.1 | 266.5 | 59   | 809.9 | 814.7 | 98   | 1146.4 | 1145.3 | 137  | 3099.0 | 3099.7 |
| 21      | 301.0 | 303.8 | 60   | 817.6 | 818.0 | 99   | 1168.9 | 1173.2 | 138  | 3108.3 | 3108.6 |
| 22      | 331.9 | 329.7 | 61   | 817.6 | 818.0 | 100  | 1174.1 | 1177.0 | 139  | 3108.3 | 3108.6 |
| 23      | 358.0 | 357.0 | 62   | 820.0 | 840.4 | 101  | 1201.7 | 1210.1 | 140  | 3114.4 | 3115.8 |
| 24      | 374.8 | 376.1 | 63   | 837.8 | 836.0 | 102  | 1228.8 | 1224.3 | 141  | 3115.4 | 3115.7 |
| 25      | 383.8 | 384.1 | 64   | 853.2 | 860.7 | 103  | 1240.0 | 1237.5 | 142  | 3115.4 | 3115.7 |
| 26      | 385.3 | 385.5 | 65   | 855.5 | 857.9 | 104  | 1249.3 | 1234.4 | 143  | 3116.0 | 3117.0 |
| 27      | 394.7 | 395.6 | 66   | 861.0 | 862.1 | 105  | 1262.5 | 1265.0 | 144  | 3119.8 | 3121.9 |
| 28      | 397.5 | 398.4 | 67   | 861.4 | 864.6 | 106  | 1279.3 | 1254.9 | 145  | 3123.4 | 3123.7 |
| 29      | 410.4 | 411.4 | 68   | 874.0 | 874.4 | 107  | 1284.6 | 1284.8 | 146  | 3123.4 | 3123.7 |
| 30      | 425.8 | 427.0 | 69   | 880.0 | 880.3 | 108  | 1284.7 | 1284.9 | 147  | 3127.9 | 3129.9 |
| 31      | 433.3 | 434.8 | 70   | 887.3 | 887.0 | 109  | 1295.6 | 1297.6 | 148  | 3128.8 | 3129.1 |
| 32      | 443.9 | 438.9 | 71   | 899.0 | 900.2 | 110  | 1297.0 | 1315.7 | 149  | 3128.8 | 3129.1 |
| 33      | 454.6 | 455.0 | 72   | 902.4 | 899.8 | 111  | 1336.8 | 1336.6 | 150  | 3134.8 | 3135.1 |
| 34      | 456.8 | 459.2 | 73   | 904.8 | 912.4 | 112  | 1336.9 | 1336.6 | 151  | 3134.9 | 3135.1 |
| 35      | 471.8 | 471.8 | 74   | 913.6 | 922.2 | 113  | 1355.5 | 1362.6 | 152  | 3143.6 | 3144.3 |
| 36      | 481.1 | 480.8 | 75   | 934.5 | 934.8 | 114  | 1366.6 | 1348.0 | 153  | 3144.0 | 3144.4 |
| 37      | 497.6 | 498.5 | 76   | 934.5 | 934.8 | 115  | 1392.4 | 1374.3 | 154  | 3145.8 | 3148.6 |
| 38      | 501.1 | 501.1 | 77   | 938.9 | 939.2 | 116  | 1401.9 | 1407.2 | 155  | 3147.8 | 3145.8 |
| 39      | 539.6 | 538.9 | 78   | 939.0 | 939.4 | 117  | 1420.1 | 1419.7 | 156  | 3150.8 | 3149.8 |
| TBN-TPA |       |       |      |       |       |      |        |        |      |        |        |
| 1       | 8.6   | 8.5   | 109  | 466.1 | 464.0 | 217  | 1071.8 | 1073.1 | 325  | 1461.3 | 1461.6 |
| 2       | 11.8  | 11.8  | 110  | 473.0 | 471.8 | 218  | 1077.8 | 1078.5 | 326  | 1461.7 | 1461.7 |
| 3       | 13.1  | 13.0  | 111  | 480.8 | 483.2 | 219  | 1090.6 | 1090.3 | 327  | 1462.4 | 1462.4 |
| 4       | 14.5  | 14.4  | 112  | 490.7 | 490.8 | 220  | 1093.1 | 1093.2 | 328  | 1462.6 | 1464.4 |
| 5       | 22.2  | 23.3  | 113  | 492.5 | 491.3 | 221  | 1093.4 | 1093.5 | 329  | 1462.6 | 1462.6 |
| 6       | 22.9  | 22.0  | 114  | 504.2 | 505.8 | 222  | 1100.2 | 1099.9 | 330  | 1463.0 | 1463.0 |
| 7       | 25.2  | 25.2  | 115  | 505.1 | 504.6 | 223  | 1105.0 | 1105.1 | 331  | 1463.5 | 1463.5 |
| 8       | 27.7  | 27.0  | 116  | 511.1 | 510.3 | 224  | 1105.6 | 1105.6 | 332  | 1471.5 | 1472.2 |
| 9       | 28.5  | 27.6  | 117  | 522.6 | 522.4 | 225  | 1112.7 | 1113.8 | 333  | 1473.0 | 1473.1 |
| 10      | 30.5  | 30.7  | 118  | 523.2 | 522.7 | 226  | 1120.3 | 1122.1 | 334  | 1473.6 | 1473.9 |
| 11      | 31.8  | 32.3  | 119  | 545.1 | 544.6 | 227  | 1125.3 | 1126.2 | 335  | 1474.1 | 1474.4 |
| 12      | 34.0  | 33.9  | 120  | 547.7 | 547.7 | 228  | 1131.9 | 1131.3 | 336  | 1474.8 | 1475.5 |
| 13      | 36.8  | 37.0  | 121  | 550.0 | 550.1 | 229  | 1143.7 | 1140.5 | 337  | 1476.2 | 1476.2 |
| 14      | 38.8  | 38.8  | 122  | 563.9 | 564.3 | 230  | 1150.5 | 1151.8 | 338  | 1477.3 | 1452.4 |
| 15      | 41.3  | 40.9  | 123  | 564.9 | 566.5 | 231  | 1158.7 | 1158.4 | 339  | 1478.8 | 1478.7 |
| 16      | 59.7  | 60.1  | 124  | 575.4 | 575.5 | 232  | 1159.2 | 1159.5 | 340  | 1492.5 | 1492.8 |
| 17      | 61.6  | 62.1  | 125  | 581.6 | 581.8 | 233  | 1179.5 | 1181.6 | 341  | 1504.3 | 1501.0 |
| 18      | 64.3  | 64.2  | 126  | 584.9 | 590.0 | 234  | 1194.8 | 1196.2 | 342  | 1506.5 | 1501.9 |
| 19      | 65.8  | 65.9  | 127  | 589.1 | 588.7 | 235  | 1199.3 | 1189.4 | 343  | 1515.7 | 1524.6 |
| 20      | 67.9  | 68.0  | 128  | 593.6 | 593.7 | 236  | 1212.4 | 1212.4 | 344  | 1528.9 | 1512.0 |
| 21      | 73.4  | 73.2  | 129  | 602.3 | 607.5 | 237  | 1215.0 | 1217.0 | 345  | 1530.8 | 1491.6 |
| 22      | 76.7  | 76.2  | 130  | 602.4 | 602.3 | 238  | 1216.2 | 1216.1 | 346  | 1543.6 | 1549.5 |
| 23      | 87.1  | 86.1  | 131  | 612.8 | 613.0 | 239  | 1216.5 | 1216.4 | 347  | 1562.2 | 1567.8 |
| 24      | 92.2  | 91.7  | 132  | 613.8 | 614.1 | 240  | 1216.6 | 1216.5 | 348  | 1570.5 | 1570.0 |
| 25      | 96.8  | 97.0  | 133  | 618.9 | 620.6 | 241  | 1217.7 | 1217.8 | 349  | 1571.3 | 1571.3 |
| 26      | 98.8  | 98.9  | 134  | 627.9 | 628.6 | 242  | 1218.3 | 1218.6 | 350  | 1578.8 | 1579.2 |
| 27      | 101.9 | 102.1 | 135  | 631.1 | 631.0 | 243  | 1219.8 | 1223.0 | 351  | 1579.3 | 1579.6 |
| 28      | 121.5 | 121.1 | 136  | 633.0 | 633.5 | 244  | 1220.3 | 1220.2 | 352  | 1582.4 | 1591.6 |
| 29      | 126.7 | 126.6 | 137  | 641.8 | 641.5 | 245  | 1220.5 | 1220.4 | 353  | 1614.3 | 1613.9 |
| 30      | 147.7 | 148.2 | 138  | 651.4 | 650.8 | 246  | 1221.0 | 1220.9 | 354  | 1615.9 | 1615.8 |

|     |       |       |     |        |        |     |        |        |     |        |        |
|-----|-------|-------|-----|--------|--------|-----|--------|--------|-----|--------|--------|
| 31  | 149.6 | 150.3 | 139 | 667.7  | 667.1  | 247 | 1221.6 | 1221.6 | 355 | 1616.5 | 1617.0 |
| 32  | 155.6 | 155.7 | 140 | 671.6  | 665.5  | 248 | 1228.2 | 1174.9 | 356 | 1636.9 | 1637.2 |
| 33  | 163.1 | 162.5 | 141 | 693.2  | 692.7  | 249 | 1230.5 | 1230.7 | 357 | 2956.1 | 2957.0 |
| 34  | 171.0 | 171.3 | 142 | 698.0  | 697.9  | 250 | 1231.5 | 1231.8 | 358 | 2956.2 | 2957.1 |
| 35  | 177.4 | 177.5 | 143 | 712.8  | 710.0  | 251 | 1237.1 | 1230.3 | 359 | 2956.7 | 2956.5 |
| 36  | 185.3 | 185.2 | 144 | 713.8  | 713.9  | 252 | 1250.5 | 1250.8 | 360 | 2956.9 | 2956.7 |
| 37  | 191.9 | 191.9 | 145 | 743.2  | 737.9  | 253 | 1258.6 | 1256.6 | 361 | 2957.8 | 2958.5 |
| 38  | 196.2 | 196.8 | 146 | 754.5  | 751.9  | 254 | 1261.0 | 1246.8 | 362 | 2958.0 | 2957.9 |
| 39  | 206.8 | 206.3 | 147 | 755.8  | 752.9  | 255 | 1275.4 | 1275.6 | 363 | 2958.0 | 2958.8 |
| 40  | 212.8 | 211.8 | 148 | 761.7  | 764.4  | 256 | 1278.0 | 1278.4 | 364 | 2958.1 | 2958.0 |
| 41  | 220.3 | 220.1 | 149 | 764.9  | 765.6  | 257 | 1278.8 | 1278.9 | 365 | 2958.6 | 2958.5 |
| 42  | 224.2 | 224.4 | 150 | 770.5  | 771.3  | 258 | 1280.4 | 1281.1 | 366 | 2959.0 | 2959.1 |
| 43  | 225.7 | 225.6 | 151 | 783.1  | 794.8  | 259 | 1281.2 | 1282.1 | 367 | 2960.0 | 2960.1 |
| 44  | 226.6 | 226.1 | 152 | 792.9  | 793.2  | 260 | 1281.6 | 1281.8 | 368 | 2960.1 | 2960.1 |
| 45  | 231.7 | 230.6 | 153 | 805.2  | 805.3  | 261 | 1283.2 | 1284.9 | 369 | 2963.3 | 2963.8 |
| 46  | 235.0 | 235.0 | 154 | 809.5  | 809.7  | 262 | 1284.6 | 1292.8 | 370 | 2963.5 | 2963.4 |
| 47  | 237.8 | 237.4 | 155 | 810.0  | 810.2  | 263 | 1291.2 | 1293.5 | 371 | 2963.6 | 2963.5 |
| 48  | 239.1 | 238.6 | 156 | 811.8  | 811.2  | 264 | 1296.6 | 1308.1 | 372 | 2964.0 | 2964.5 |
| 49  | 240.0 | 239.7 | 157 | 813.3  | 815.6  | 265 | 1303.1 | 1303.2 | 373 | 2964.5 | 2964.4 |
| 50  | 254.6 | 254.2 | 158 | 820.8  | 841.4  | 266 | 1305.6 | 1310.9 | 374 | 2965.0 | 2965.0 |
| 51  | 256.4 | 256.0 | 159 | 827.0  | 827.4  | 267 | 1332.3 | 1332.2 | 375 | 3051.6 | 3052.6 |
| 52  | 258.2 | 257.9 | 160 | 829.8  | 828.5  | 268 | 1333.0 | 1332.7 | 376 | 3051.8 | 3052.8 |
| 53  | 260.7 | 260.4 | 161 | 832.9  | 834.0  | 269 | 1342.5 | 1266.6 | 377 | 3051.9 | 3052.9 |
| 54  | 270.7 | 270.4 | 162 | 837.8  | 838.6  | 270 | 1347.1 | 1353.4 | 378 | 3052.0 | 3051.7 |
| 55  | 271.7 | 271.2 | 163 | 839.4  | 839.4  | 271 | 1351.9 | 1356.3 | 379 | 3052.2 | 3051.9 |
| 56  | 276.1 | 276.0 | 164 | 839.6  | 839.5  | 272 | 1357.7 | 1363.8 | 380 | 3052.4 | 3053.2 |
| 57  | 278.4 | 277.3 | 165 | 843.4  | 843.5  | 273 | 1360.4 | 1360.4 | 381 | 3053.3 | 3053.1 |
| 58  | 279.3 | 278.3 | 166 | 845.2  | 846.2  | 274 | 1360.5 | 1360.5 | 382 | 3053.4 | 3053.1 |
| 59  | 281.0 | 281.0 | 167 | 858.7  | 862.9  | 275 | 1361.3 | 1361.3 | 383 | 3056.7 | 3056.7 |
| 60  | 283.0 | 282.7 | 168 | 860.4  | 864.2  | 276 | 1361.4 | 1361.3 | 384 | 3056.7 | 3056.9 |
| 61  | 285.3 | 285.5 | 169 | 869.8  | 871.0  | 277 | 1361.5 | 1357.1 | 385 | 3057.2 | 3057.2 |
| 62  | 288.4 | 287.9 | 170 | 890.1  | 887.1  | 278 | 1362.8 | 1362.8 | 386 | 3057.4 | 3057.4 |
| 63  | 290.1 | 290.9 | 171 | 891.4  | 891.6  | 279 | 1363.7 | 1363.8 | 387 | 3057.9 | 3058.6 |
| 64  | 300.3 | 304.8 | 172 | 893.5  | 893.5  | 280 | 1364.0 | 1364.1 | 388 | 3058.6 | 3059.3 |
| 65  | 315.0 | 315.5 | 173 | 899.4  | 899.6  | 281 | 1364.5 | 1364.5 | 389 | 3059.4 | 3059.2 |
| 66  | 316.4 | 316.9 | 174 | 899.7  | 898.7  | 282 | 1365.2 | 1365.4 | 390 | 3059.7 | 3059.5 |
| 67  | 325.6 | 326.6 | 175 | 902.8  | 903.0  | 283 | 1365.9 | 1363.3 | 391 | 3063.0 | 3063.1 |
| 68  | 328.5 | 328.7 | 176 | 904.5  | 902.1  | 284 | 1368.3 | 1375.1 | 392 | 3063.5 | 3063.6 |
| 69  | 334.2 | 333.3 | 177 | 906.2  | 905.6  | 285 | 1373.8 | 1380.6 | 393 | 3065.2 | 3065.1 |
| 70  | 336.4 | 336.4 | 178 | 921.6  | 923.3  | 286 | 1379.9 | 1357.7 | 394 | 3065.9 | 3065.9 |
| 71  | 337.2 | 337.2 | 179 | 924.1  | 924.0  | 287 | 1385.9 | 1372.5 | 395 | 3066.2 | 3066.2 |
| 72  | 337.9 | 337.9 | 180 | 924.1  | 924.6  | 288 | 1388.6 | 1389.1 | 396 | 3066.3 | 3066.2 |
| 73  | 338.3 | 338.2 | 181 | 924.2  | 924.1  | 289 | 1389.6 | 1389.2 | 397 | 3068.0 | 3069.0 |
| 74  | 339.2 | 338.3 | 182 | 925.3  | 925.8  | 290 | 1389.8 | 1389.8 | 398 | 3068.5 | 3069.6 |
| 75  | 339.4 | 339.1 | 183 | 925.6  | 925.5  | 291 | 1390.4 | 1389.7 | 399 | 3068.6 | 3068.7 |
| 76  | 341.5 | 341.2 | 184 | 925.9  | 926.0  | 292 | 1391.5 | 1391.4 | 400 | 3068.8 | 3068.8 |
| 77  | 342.5 | 342.3 | 185 | 931.4  | 931.6  | 293 | 1391.5 | 1391.6 | 401 | 3069.0 | 3069.0 |
| 78  | 344.8 | 344.8 | 186 | 931.6  | 931.8  | 294 | 1393.5 | 1391.7 | 402 | 3069.0 | 3068.9 |
| 79  | 346.8 | 346.5 | 187 | 931.9  | 930.9  | 295 | 1402.5 | 1402.5 | 403 | 3069.5 | 3069.5 |
| 80  | 347.5 | 347.5 | 188 | 932.6  | 932.6  | 296 | 1402.6 | 1402.6 | 404 | 3070.0 | 3069.7 |
| 81  | 348.1 | 348.1 | 189 | 932.8  | 932.8  | 297 | 1427.2 | 1428.0 | 405 | 3070.6 | 3071.5 |
| 82  | 355.3 | 355.4 | 190 | 932.9  | 933.3  | 298 | 1431.6 | 1416.0 | 406 | 3070.6 | 3070.5 |
| 83  | 358.7 | 358.8 | 191 | 934.0  | 933.9  | 299 | 1434.3 | 1395.7 | 407 | 3071.0 | 3072.1 |
| 84  | 368.1 | 368.3 | 192 | 934.0  | 933.9  | 300 | 1437.6 | 1437.6 | 408 | 3071.1 | 3072.1 |
| 85  | 369.0 | 369.3 | 193 | 936.8  | 937.1  | 301 | 1438.0 | 1438.0 | 409 | 3071.7 | 3071.0 |
| 86  | 372.1 | 372.5 | 194 | 937.4  | 937.3  | 302 | 1438.4 | 1438.4 | 410 | 3073.8 | 3074.4 |
| 87  | 384.1 | 383.5 | 195 | 937.7  | 937.6  | 303 | 1438.6 | 1438.7 | 411 | 3104.1 | 3103.5 |
| 88  | 385.0 | 385.2 | 196 | 938.6  | 935.9  | 304 | 1439.2 | 1439.2 | 412 | 3107.2 | 3106.4 |
| 89  | 388.9 | 388.3 | 197 | 939.4  | 939.7  | 305 | 1439.3 | 1439.2 | 413 | 3107.7 | 3110.5 |
| 90  | 389.7 | 389.9 | 198 | 939.9  | 939.7  | 306 | 1440.0 | 1440.0 | 414 | 3107.9 | 3111.0 |
| 91  | 392.9 | 391.9 | 199 | 940.0  | 940.1  | 307 | 1440.9 | 1440.9 | 415 | 3109.7 | 3110.2 |
| 92  | 393.1 | 392.6 | 200 | 995.8  | 995.2  | 308 | 1440.9 | 1441.1 | 416 | 3111.2 | 3111.4 |
| 93  | 393.6 | 394.0 | 201 | 997.8  | 997.8  | 309 | 1441.0 | 1441.2 | 417 | 3113.3 | 3113.7 |
| 94  | 394.8 | 395.4 | 202 | 1005.3 | 1004.8 | 310 | 1441.9 | 1441.8 | 418 | 3115.6 | 3115.7 |
| 95  | 403.2 | 404.0 | 203 | 1017.2 | 1019.7 | 311 | 1442.8 | 1442.8 | 419 | 3124.9 | 3125.3 |
| 96  | 407.8 | 406.1 | 204 | 1020.1 | 1020.1 | 312 | 1444.5 | 1443.7 | 420 | 3126.2 | 3126.4 |
| 97  | 412.3 | 412.3 | 205 | 1020.3 | 1020.2 | 313 | 1445.0 | 1445.6 | 421 | 3126.8 | 3126.3 |
| 98  | 412.8 | 413.2 | 206 | 1020.3 | 1018.9 | 314 | 1445.5 | 1445.4 | 422 | 3128.4 | 3127.4 |
| 99  | 416.8 | 417.1 | 207 | 1020.6 | 1020.8 | 315 | 1445.9 | 1446.0 | 423 | 3129.6 | 3128.6 |
| 100 | 419.4 | 418.5 | 208 | 1021.3 | 1020.5 | 316 | 1446.6 | 1446.6 | 424 | 3130.6 | 3129.8 |
| 101 | 427.6 | 427.5 | 209 | 1022.7 | 1022.4 | 317 | 1447.2 | 1447.1 | 425 | 3134.1 | 3134.4 |
| 102 | 437.7 | 437.8 | 210 | 1023.6 | 1023.3 | 318 | 1456.8 | 1457.4 | 426 | 3135.7 | 3135.9 |
| 103 | 438.8 | 439.2 | 211 | 1023.8 | 1023.7 | 319 | 1458.4 | 1458.0 | 427 | 3143.0 | 3143.6 |
| 104 | 448.7 | 448.9 | 212 | 1024.2 | 1024.2 | 320 | 1458.4 | 1458.7 | 428 | 3144.3 | 3144.6 |
| 105 | 450.4 | 450.0 | 213 | 1024.6 | 1024.6 | 321 | 1459.2 | 1459.1 | 429 | 3153.9 | 3152.3 |
| 106 | 455.9 | 456.0 | 214 | 1024.9 | 1024.9 | 322 | 1459.4 | 1459.4 | 430 | 3154.9 | 3153.3 |
| 107 | 460.9 | 461.2 | 215 | 1025.0 | 1025.0 | 323 | 1459.6 | 1459.5 | 431 | 3155.0 | 3157.0 |
| 108 | 465.0 | 467.1 | 216 | 1058.3 | 1048.7 | 324 | 1460.0 | 1460.1 | 432 | 3175.8 | 3178.3 |

TABNA

|    |       |       |    |       |       |     |        |        |     |        |        |
|----|-------|-------|----|-------|-------|-----|--------|--------|-----|--------|--------|
| 1  | 18.5  | 18.9  | 48 | 547.1 | 546.8 | 95  | 983.7  | 981.2  | 142 | 1432.9 | 1400.1 |
| 2  | 21.3  | 24.0  | 49 | 548.6 | 535.1 | 96  | 984.2  | 984.2  | 143 | 1439.0 | 1440.1 |
| 3  | 25.5  | 22.7  | 50 | 568.0 | 570.3 | 97  | 995.3  | 1030.5 | 144 | 1440.0 | 1439.4 |
| 4  | 29.5  | 30.0  | 51 | 573.9 | 568.5 | 98  | 1001.0 | 987.6  | 145 | 1440.2 | 1439.9 |
| 5  | 32.3  | 34.3  | 52 | 584.4 | 916.5 | 99  | 1007.3 | 1010.7 | 146 | 1456.1 | 1460.3 |
| 6  | 33.5  | 32.8  | 53 | 605.1 | 605.9 | 100 | 1012.7 | 1012.8 | 147 | 1477.9 | 1485.8 |
| 7  | 47.9  | 48.3  | 54 | 607.5 | 607.1 | 101 | 1014.7 | 1008.8 | 148 | 1480.4 | 1488.3 |
| 8  | 48.1  | 46.7  | 55 | 610.1 | 603.1 | 102 | 1016.5 | 1013.3 | 149 | 1487.8 | 1388.2 |
| 9  | 61.2  | 62.6  | 56 | 610.2 | 610.8 | 103 | 1044.9 | 1043.5 | 150 | 1488.6 | 1485.2 |
| 10 | 71.6  | 71.6  | 57 | 611.2 | 611.3 | 104 | 1056.1 | 1058.3 | 151 | 1491.5 | 1492.6 |
| 11 | 84.4  | 85.5  | 58 | 614.3 | 609.0 | 105 | 1058.1 | 1056.5 | 152 | 1522.5 | 1501.1 |
| 12 | 86.6  | 83.7  | 59 | 633.7 | 636.8 | 106 | 1058.2 | 1058.2 | 153 | 1541.9 | 1507.3 |
| 13 | 182.4 | 198.3 | 60 | 639.8 | 646.3 | 107 | 1058.4 | 1053.4 | 154 | 1564.5 | 1555.4 |
| 14 | 183.5 | 182.7 | 61 | 646.1 | 641.5 | 108 | 1059.4 | 1035.6 | 155 | 1565.1 | 1564.4 |
| 15 | 189.8 | 188.8 | 62 | 652.8 | 699.1 | 109 | 1131.4 | 1111.8 | 156 | 1576.8 | 1524.0 |
| 16 | 198.1 | 124.9 | 63 | 686.2 | 705.7 | 110 | 1133.6 | 1135.1 | 157 | 1596.8 | 1599.2 |
| 17 | 202.5 | 202.0 | 64 | 699.4 | 666.8 | 111 | 1135.2 | 1135.1 | 158 | 1599.1 | 1597.4 |
| 18 | 209.8 | 212.7 | 65 | 703.3 | 694.9 | 112 | 1135.2 | 1133.8 | 159 | 1599.3 | 1599.1 |
| 19 | 213.2 | 207.7 | 66 | 705.9 | 682.7 | 113 | 1141.0 | 1101.0 | 160 | 1609.0 | 1608.3 |
| 20 | 230.5 | 257.2 | 67 | 722.0 | 720.6 | 114 | 1143.1 | 1142.4 | 161 | 1610.7 | 1612.6 |
| 21 | 241.5 | 233.2 | 68 | 736.3 | 736.2 | 115 | 1143.8 | 1144.1 | 162 | 1612.4 | 1611.0 |
| 22 | 245.7 | 247.5 | 69 | 738.3 | 747.7 | 116 | 1145.0 | 1144.2 | 163 | 3099.0 | 3103.2 |
| 23 | 247.2 | 245.9 | 70 | 746.6 | 726.9 | 117 | 1145.1 | 1213.5 | 164 | 3100.9 | 3114.7 |
| 24 | 260.9 | 261.3 | 71 | 811.7 | 822.7 | 118 | 1154.7 | 1156.7 | 165 | 3103.9 | 3108.0 |
| 25 | 291.5 | 323.1 | 72 | 812.0 | 864.6 | 119 | 1174.1 | 218.3  | 166 | 3107.5 | 3104.1 |
| 26 | 318.0 | 386.4 | 73 | 816.5 | 817.0 | 120 | 1183.2 | 1190.9 | 167 | 3107.6 | 3107.7 |
| 27 | 328.0 | 330.5 | 74 | 816.6 | 818.1 | 121 | 1189.4 | 1188.5 | 168 | 3111.5 | 3115.2 |
| 28 | 384.6 | 385.2 | 75 | 817.8 | 817.3 | 122 | 1201.2 | 1189.1 | 169 | 3114.6 | 3100.6 |
| 29 | 385.0 | 388.8 | 76 | 818.1 | 825.5 | 123 | 1226.3 | 1218.2 | 170 | 3115.0 | 3111.9 |
| 30 | 389.3 | 385.5 | 77 | 819.7 | 818.7 | 124 | 1239.8 | 1263.6 | 171 | 3115.0 | 3115.1 |
| 31 | 395.8 | 424.7 | 78 | 850.7 | 844.7 | 125 | 1266.6 | 1266.8 | 172 | 3120.8 | 3123.7 |
| 32 | 421.3 | 438.0 | 79 | 851.9 | 841.8 | 126 | 1271.9 | 1227.7 | 173 | 3123.3 | 3121.0 |
| 33 | 426.2 | 421.5 | 80 | 875.2 | 830.5 | 127 | 1280.6 | 1283.9 | 174 | 3123.3 | 3123.4 |
| 34 | 429.7 | 458.6 | 81 | 875.5 | 863.8 | 128 | 1284.0 | 1281.2 | 175 | 3126.4 | 3129.0 |
| 35 | 431.1 | 428.8 | 82 | 879.5 | 879.0 | 129 | 1284.1 | 1283.7 | 176 | 3128.7 | 3126.6 |
| 36 | 438.3 | 397.8 | 83 | 884.0 | 881.4 | 130 | 1287.7 | 1286.0 | 177 | 3128.7 | 3128.8 |
| 37 | 441.0 | 437.1 | 84 | 887.0 | 883.1 | 131 | 1327.6 | 1357.7 | 178 | 3130.2 | 3135.8 |
| 38 | 449.7 | 427.7 | 85 | 888.4 | 888.2 | 132 | 1330.9 | 1334.4 | 179 | 3130.7 | 3131.0 |
| 39 | 464.7 | 460.4 | 86 | 892.5 | 897.7 | 133 | 1333.7 | 1336.4 | 180 | 3131.2 | 3128.6 |
| 40 | 469.1 | 475.6 | 87 | 894.6 | 889.0 | 134 | 1336.8 | 1334.1 | 181 | 3132.1 | 3134.8 |
| 41 | 469.6 | 469.9 | 88 | 933.8 | 934.1 | 135 | 1336.9 | 1336.2 | 182 | 3134.3 | 3132.2 |
| 42 | 479.7 | 481.8 | 89 | 933.8 | 934.3 | 136 | 1366.6 | 1361.4 | 183 | 3134.5 | 3134.5 |
| 43 | 480.4 | 473.7 | 90 | 934.4 | 934.3 | 137 | 1367.8 | 1251.0 | 184 | 3135.4 | 3129.1 |
| 44 | 494.9 | 530.5 | 91 | 936.6 | 938.6 | 138 | 1388.0 | 1456.4 | 185 | 3135.9 | 3137.2 |
| 45 | 517.6 | 505.8 | 92 | 937.8 | 936.5 | 139 | 1397.3 | 1432.5 | 186 | 3136.7 | 3135.1 |
| 46 | 539.3 | 550.0 | 93 | 938.0 | 938.1 | 140 | 1412.6 | 1329.0 |     |        |        |
| 47 | 545.3 | 542.0 | 94 | 980.7 | 983.0 | 141 | 1424.5 | 1431.9 |     |        |        |

<sup>a</sup> Triplet modes are not sorted in frequencies but matched with singlet modes such that the normal mode vectors are maximally overlapping.

Table S7: Spin-orbit coupling between excited states of DABNA calculated at the  $\omega^*$ B97X level.

| states <sup>a</sup>             | rel. energies <sup>b</sup> | M = 0 <sup>c</sup> | M = 1 <sup>c,d</sup> | magnitude <sup>c</sup> |
|---------------------------------|----------------------------|--------------------|----------------------|------------------------|
| S <sub>1</sub> /T <sub>1</sub>  | 0.144/0                    | 0.000i             | 0.053+0.000i         | 0.035                  |
| S <sub>1</sub> /T <sub>2</sub>  | 0.144/0.607                | -0.708i            | 0.000+0.487i         | 0.561                  |
| S <sub>1</sub> /T <sub>3</sub>  | 0.144/0.778                | 1.593i             | 0.000-0.409i         | 0.804                  |
| S <sub>1</sub> /T <sub>4</sub>  | 0.144/0.896                | 0.000i             | -0.163+0.000i        | 0.109                  |
| S <sub>1</sub> /T <sub>5</sub>  | 0.144/1.113                | 0.000i             | -0.153+0.000i        | 0.102                  |
| S <sub>1</sub> /T <sub>6</sub>  | 0.144/1.353                | -0.632i            | 0.000-0.145i         | 0.307                  |
| S <sub>1</sub> /T <sub>7</sub>  | 0.144/1.412                | -0.137i            | 0.000+0.091i         | 0.106                  |
| S <sub>1</sub> /T <sub>8</sub>  | 0.144/1.431                | 0.000i             | 0.079-0.001i         | 0.053                  |
| S <sub>1</sub> /T <sub>9</sub>  | 0.144/1.433                | -0.104i            | 0.000-0.109i         | 0.107                  |
| S <sub>1</sub> /T <sub>10</sub> | 0.144/1.506                | 0.000i             | 0.187+0.000i         | 0.125                  |
| S <sub>1</sub> /T <sub>11</sub> | 0.144/1.477                | 0.150i             | 0.000-1.461i         | 1.024                  |
| S <sub>1</sub> /T <sub>12</sub> | 0.144/1.529                | 0.000i             | 0.843+0.000i         | 0.562                  |
| S <sub>1</sub> /T <sub>13</sub> | 0.144/1.734                | -0.373i            | 0.000+0.178i         | 0.243                  |
| S <sub>1</sub> /T <sub>14</sub> | 0.144/1.726                | -0.613i            | 0.000-0.186i         | 0.329                  |
| S <sub>1</sub> /T <sub>15</sub> | 0.144/1.780                | 0.000i             | 0.150+0.000i         | 0.100                  |
| S <sub>1</sub> /T <sub>16</sub> | 0.144/2.032                | -0.085i            | 0.000+0.012i         | 0.036                  |
| S <sub>1</sub> /T <sub>17</sub> | 0.144/2.037                | 0.000i             | -0.049+0.000i        | 0.032                  |
| S <sub>1</sub> /T <sub>18</sub> | 0.144/2.043                | 0.021i             | 0.000-0.170i         | 0.120                  |
| S <sub>1</sub> /T <sub>19</sub> | 0.144/2.048                | 0.000i             | 0.023+0.000i         | 0.015                  |
| S <sub>1</sub> /T <sub>20</sub> | 0.144/2.081                | -0.202i            | 0.000+0.089i         | 0.127                  |
| S <sub>2</sub> /T <sub>1</sub>  | 0.980/0                    | 0.000i             | 0.163+0.000i         | 0.108                  |
| S <sub>3</sub> /T <sub>1</sub>  | 1.025/0                    | 0.607i             | 0.000-0.428i         | 0.487                  |
| S <sub>4</sub> /T <sub>1</sub>  | 1.022/0                    | -0.178i            | 0.000+1.370i         | 0.973                  |
| S <sub>5</sub> /T <sub>1</sub>  | 1.077/0                    | 0.000i             | -1.258+0.000i        | 0.839                  |
| S <sub>6</sub> /T <sub>1</sub>  | 1.237/0                    | 1.609i             | 0.000-0.137i         | 0.627                  |
| S <sub>7</sub> /T <sub>1</sub>  | 1.359/0                    | -0.397i            | 0.000+0.319i         | 0.345                  |
| S <sub>8</sub> /T <sub>1</sub>  | 1.443/0                    | 0.000i             | 0.256+0.000i         | 0.171                  |
| S <sub>9</sub> /T <sub>1</sub>  | 1.834/0                    | 0.000i             | 0.025-0.001i         | 0.017                  |
| S <sub>10</sub> /T <sub>1</sub> | 1.865/0                    | 0.538i             | 0.001-0.437i         | 0.471                  |
| S <sub>11</sub> /T <sub>1</sub> | 1.919/0                    | 0.000i             | 0.156+0.000i         | 0.104                  |
| S <sub>12</sub> /T <sub>1</sub> | 2.020/0                    | -0.853i            | 0.000+0.278i         | 0.470                  |
| S <sub>13</sub> /T <sub>1</sub> | 2.148/0                    | 0.000i             | -0.171+0.000i        | 0.114                  |
| S <sub>14</sub> /T <sub>1</sub> | 2.205/0                    | 0.000i             | 0.115+0.000i         | 0.077                  |
| S <sub>15</sub> /T <sub>1</sub> | 2.206/0                    | -0.068i            | 0.000-0.163i         | 0.131                  |
| S <sub>16</sub> /T <sub>1</sub> | 2.314/0                    | 0.000i             | -0.309+0.000i        | 0.206                  |
| S <sub>17</sub> /T <sub>1</sub> | 2.423/0                    | -0.328i            | 0.000-0.040i         | 0.136                  |
| S <sub>18</sub> /T <sub>1</sub> | 2.482/0                    | -0.001i            | 0.335+0.001i         | 0.224                  |
| S <sub>19</sub> /T <sub>1</sub> | 2.440/0                    | 0.000i             | -0.325-0.001i        | 0.217                  |
| S <sub>20</sub> /T <sub>1</sub> | 2.491/0                    | -0.428i            | 0.001-0.863i         | 0.718                  |

<sup>a</sup> Corresponding NTO pairs are depicted in Figure S4. <sup>b</sup> Relative energies in eV with respect to T<sub>1</sub>.  $\Delta E_{\text{ST}}$  from the SCS-CC2 level is adopted. <sup>c</sup> In cm<sup>-1</sup> unit. <sup>d</sup>  $\text{SOC}(M = -1) = -\text{SOC}(M = 1)^*$ .

Table S8: Normal mode specific  $S_1-T_1$  reorganization energies ( $\lambda$ ) of DABNA.<sup>a</sup>

| frequency | $\lambda$ | frequency | $\lambda$ | frequency | $\lambda$ |
|-----------|-----------|-----------|-----------|-----------|-----------|
| 20.32     | 0.13      | 636.07    | 0.04      | 1139.30   | 1.45      |
| 42.06     | 0.05      | 700.80    | 0.02      | 1144.04   | 0.01      |
| 72.57     | 0.23      | 705.22    | 1.15      | 1174.13   | 0.05      |
| 116.44    | 0.12      | 724.21    | 0.15      | 1201.72   | 0.14      |
| 165.57    | 0.01      | 809.88    | 0.01      | 1249.34   | 0.04      |
| 195.86    | 0.33      | 819.96    | 0.01      | 1262.49   | 0.02      |
| 201.23    | 0.26      | 853.23    | 0.02      | 1297.00   | 1.89      |
| 233.48    | 0.11      | 855.47    | 0.03      | 1366.63   | 9.30      |
| 252.97    | 0.05      | 874.03    | 0.37      | 1392.43   | 0.14      |
| 374.81    | 0.53      | 887.33    | 0.12      | 1430.09   | 5.22      |
| 385.30    | 0.01      | 899.01    | 1.85      | 1440.63   | 0.01      |
| 397.45    | 0.50      | 902.42    | 0.01      | 1460.37   | 1.28      |
| 410.39    | 1.30      | 904.84    | 0.03      | 1488.95   | 0.13      |
| 425.79    | 0.87      | 913.58    | 0.13      | 1493.79   | 0.34      |
| 433.31    | 0.02      | 934.51    | 0.02      | 1549.48   | 1.79      |
| 471.76    | 0.04      | 939.03    | 0.01      | 1576.58   | 1.86      |
| 497.58    | 0.05      | 1012.63   | 0.01      | 1610.38   | 0.02      |
| 539.63    | 0.03      | 1041.01   | 0.62      | 3098.99   | 0.02      |
| 546.98    | 0.26      | 1061.36   | 0.01      | 3119.83   | 0.04      |
| 608.04    | 0.01      | 1079.15   | 0.04      | 3150.76   | 0.03      |
| 612.31    | 0.10      | 1127.75   | 0.42      |           |           |

<sup>a</sup> Both frequency and  $\lambda$  values are in  $\text{cm}^{-1}$  units.

Table S9: Dependence of the golden rule rate on the dephasing timescale of the damped Lorentzian for DABNA.

| $\gamma^a$ | $k_{\text{RISC}} (10^4 \text{ s}^{-1})^b$ |
|------------|-------------------------------------------|
| 1 ps       | 2.00                                      |
| 10 ps      | 1.95                                      |
| 100 ps     | 1.95                                      |
| 1 ns       | 1.95                                      |
| 10 ns      | 1.95                                      |
| 100 ns     | 1.95                                      |

<sup>a</sup> The corresponding time correlation was monitored carefully for its decay to zero earlier than  $\gamma$  in all cases. <sup>b</sup> Rate values at  $\Delta E_{\text{ST}} = 0.148 \text{ eV}$ .



## Supporting Information Figures

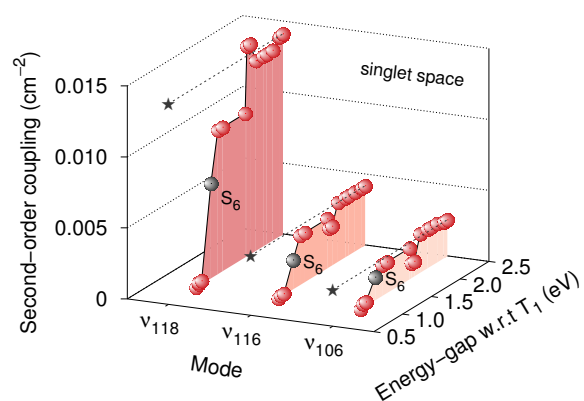

Figure S1: Convergence profiles of the sum-over-electronic-states expansion for each mode in the singlet manifold. The excited state with a dominant contribution ( $S_6$ ) can be easily identified as marked with gray spheres. Convergence was reached with 20 excited states as denoted with dashed lines and stars.

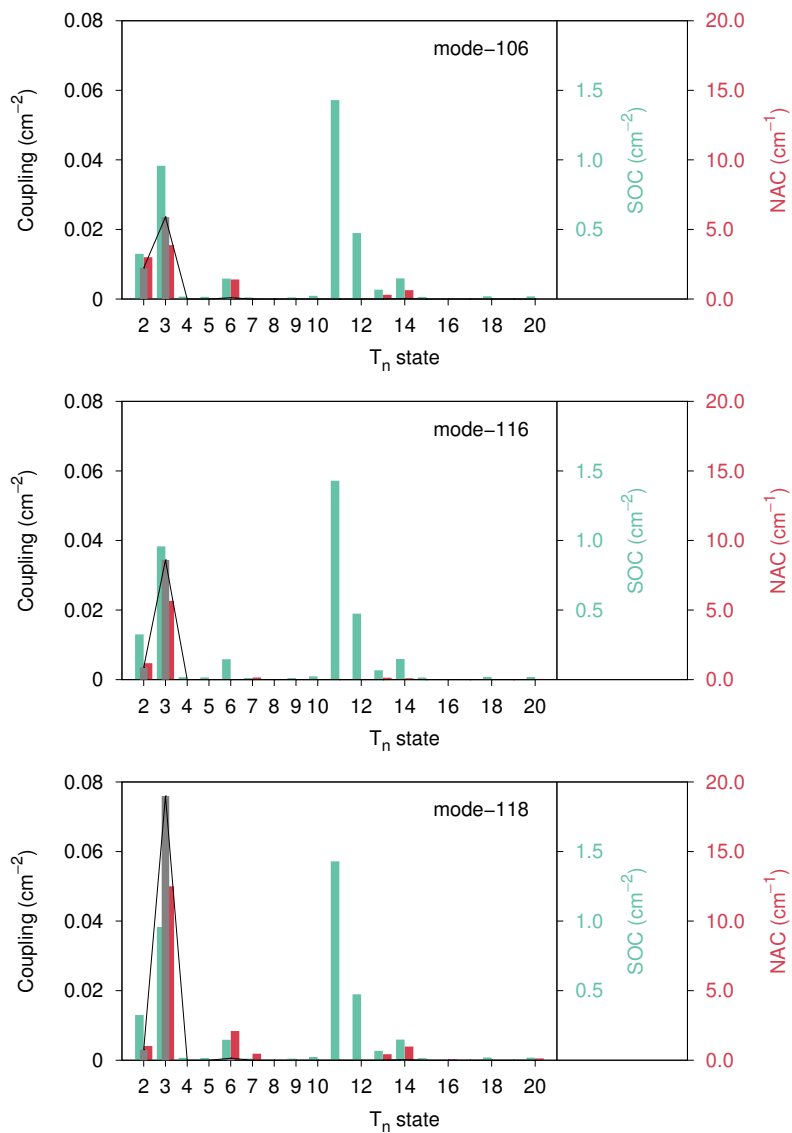

Figure S2: Spin-orbit (green) and mode-projected nonadiabatic (red) couplings contributed by each triplet state to the spin-vibronic term. Only the electronic terms are shown. Projections were carried out onto each mode vector, normalized in the atomic unit ( $\sqrt{m_e} \cdot \text{bohr}$ ). The combined coupling including the energy denominator is also shown in gray.

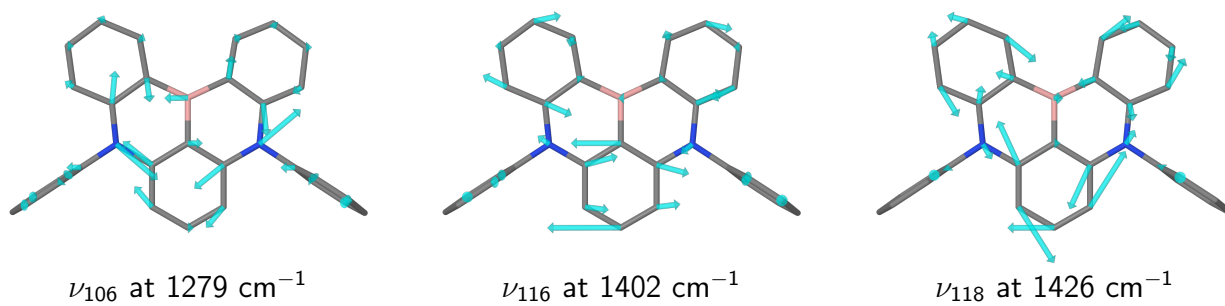

Figure S3: Important normal vibrations of DABNA in the  $S_1$  state.  $T_1$  vibrational motions are very similar and cannot be visually distinguished from the  $S_1$  ones. Hydrogen atoms are omitted for visual clarity.

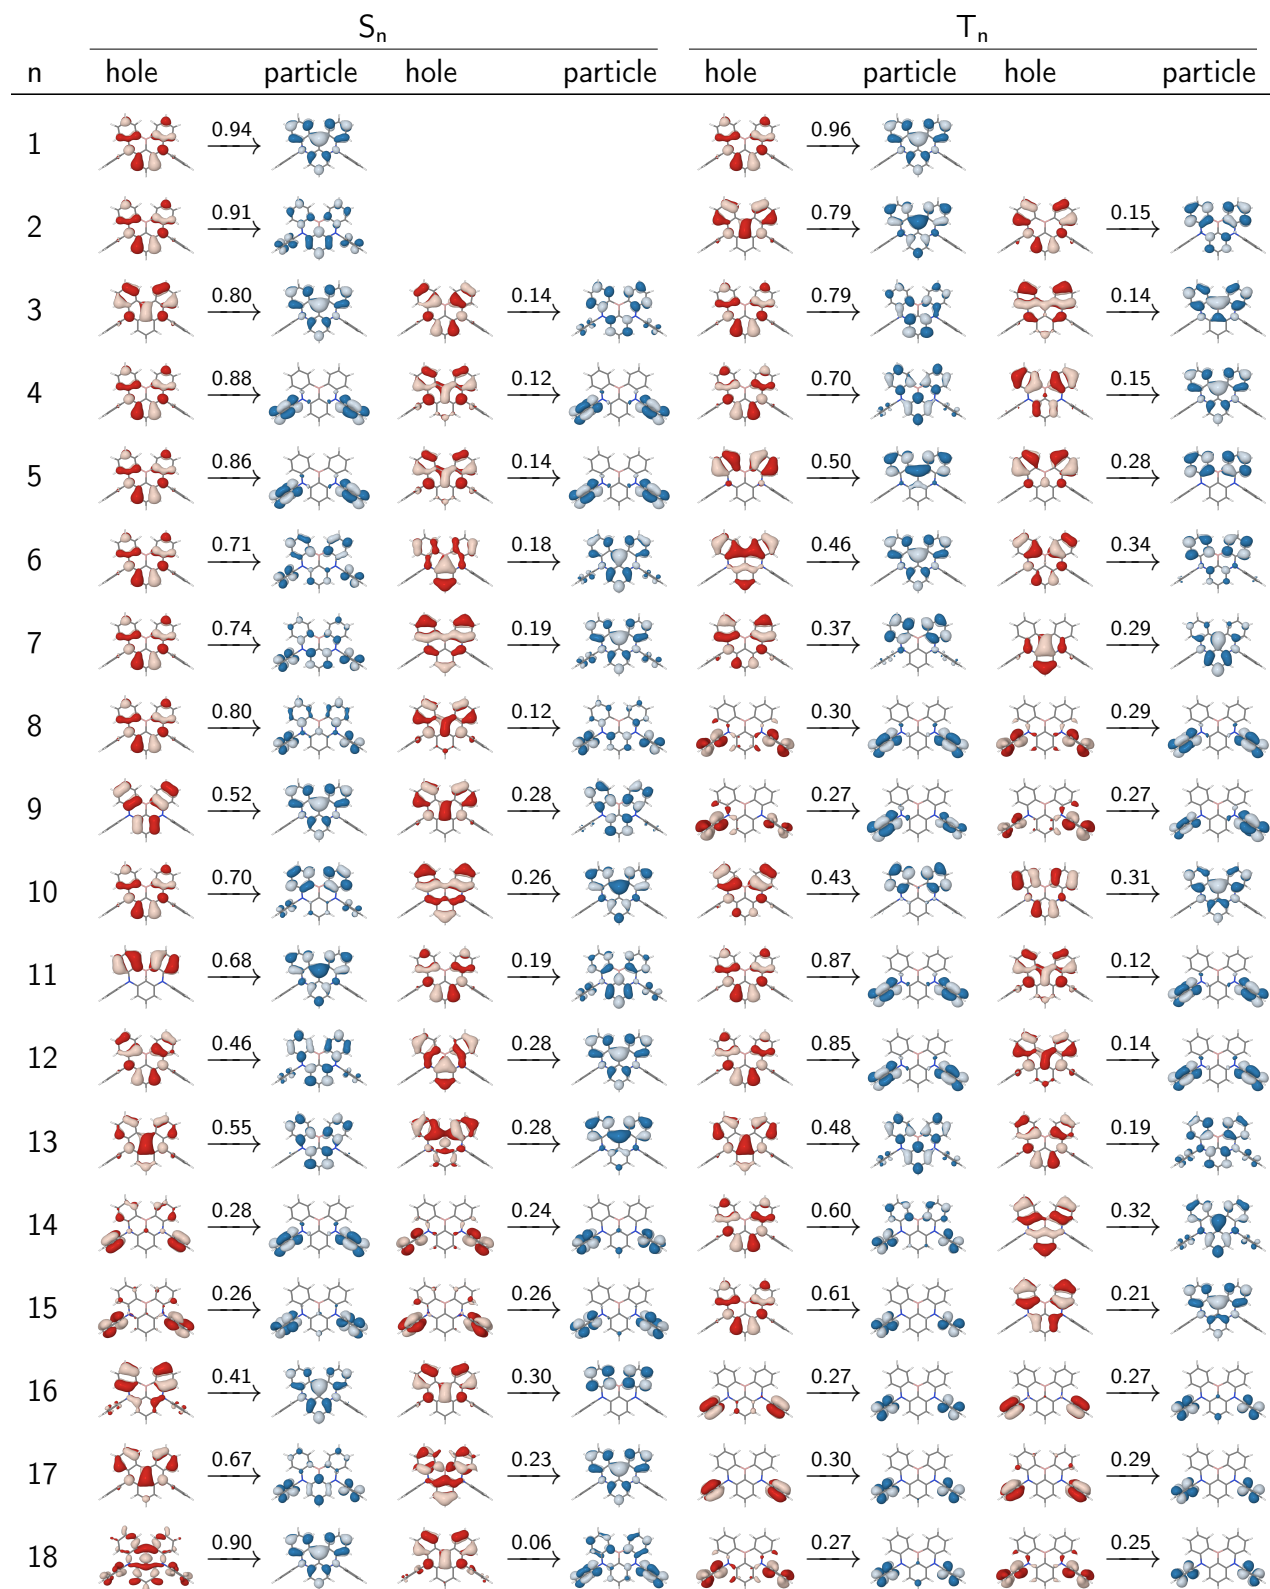

Figure S4: Natural transition orbital (NTO) pairs at the  $\omega^*$ B97X level with Tamm-Dancoff approximation for the excited states of DABNA. Hole (red) and particle (blue) wavefunctions with dominant weights are shown.

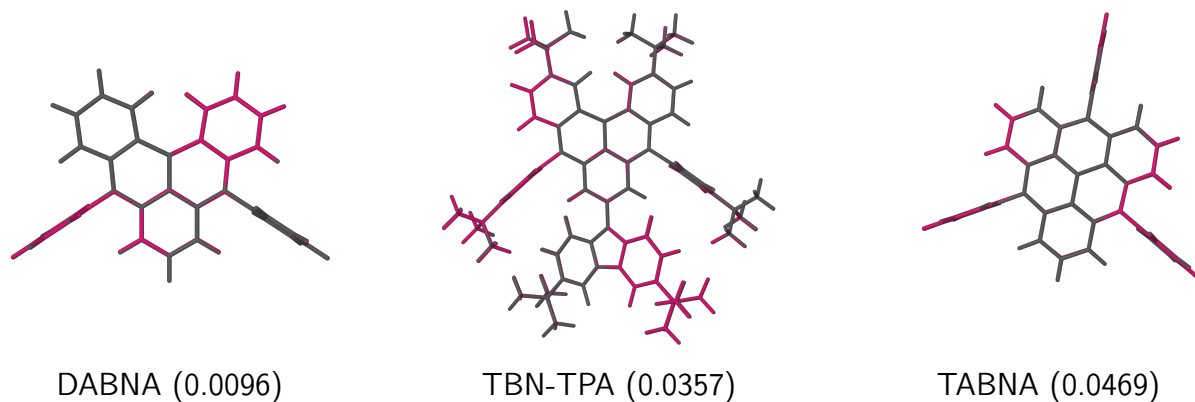

Figure S5: Excited state geometries of MR-TADF emitters. The  $S_1$  and the  $T_1$  geometries are respectively shown in gray and magenta. The geometries were aligned with the Eckart condition and the corresponding root-mean-squared deviations (in Å) are given in parentheses.

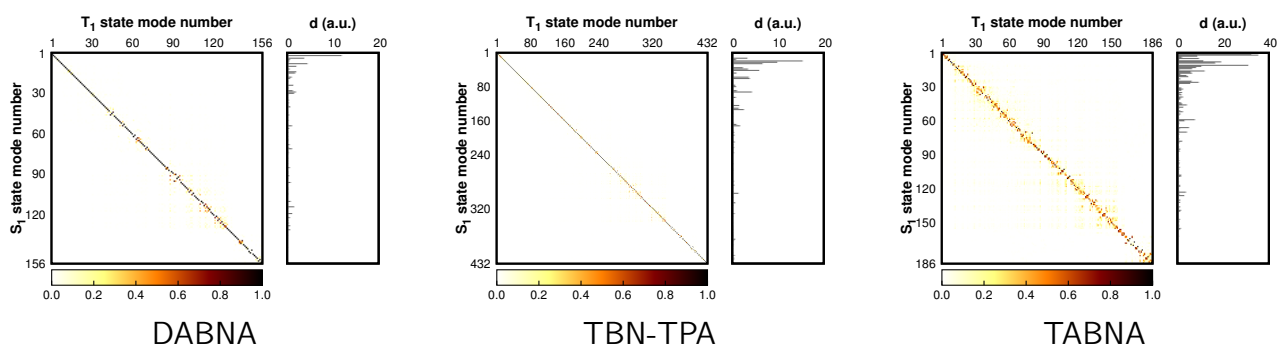

Figure S6: Duschinsky matrices and displacement vectors related to the RISC transitions. The sizes of the matrix and the vector elements are displayed with their absolute values.

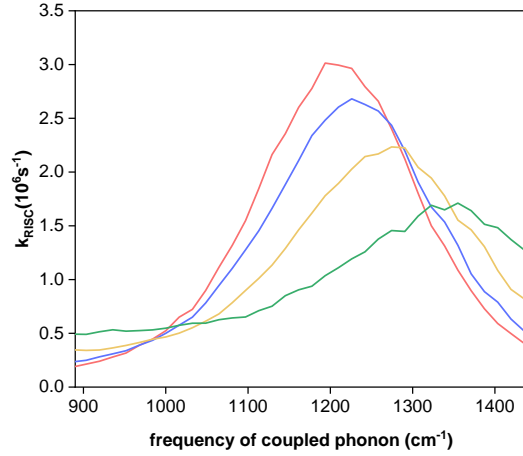

Figure S7: Effect of fictitiously increasing the emitter-specific  $S_1$ - $T_1$  reorganization energy  $\lambda'_{em}$  on the resonance enhancement of RISC rate, estimated with PBME-nH simulations. The red line displays the rate profile with the physical reorganization energy,  $\lambda'_{em} = \lambda_{em}$ , as obtained with the SCS-ADC(2)/SVP level. Blue, yellow, and green lines progressively show the profiles with  $\lambda'_{em} = 2\lambda_{em}$ ,  $4\lambda_{em}$ , and  $8\lambda_{em}$ . Fictitiously increasing  $\lambda'_{em}$  is equivalent to increasing the  $S_1$ - $T_1$  geometric displacement  $\vec{d}'$  as employed in Figure 6 in the main text. It is apparent that the resonance enhancement diminishes with a larger displacement, in agreement with Figure 6b.

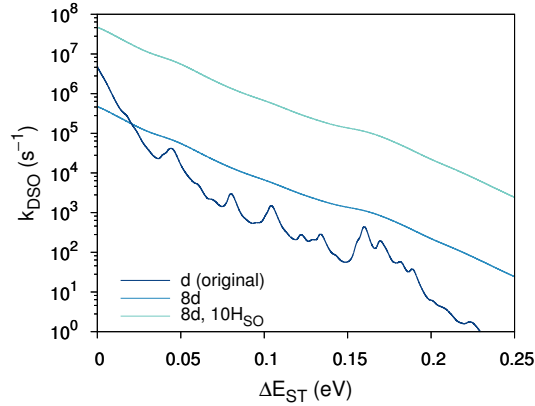

Figure S8: Displacement dependence of the first-order direct spin-orbit RISC rates at varying  $\Delta E_{ST}$ . The original displacement vector  $\vec{d}$  of DABNA was modified as in Figure 6b. At large  $\vec{d}' = 8\vec{d}$  (corresponding to  $\lambda = 2128 \text{ cm}^{-1}$ ) with  $H'_{SO} = 10H_{SO}$  (corresponding to  $0.35 \text{ cm}^{-1}$ ),  $k_{DSO}$  behaves similarly to the rate in DA-TADF emitters (ref S1).

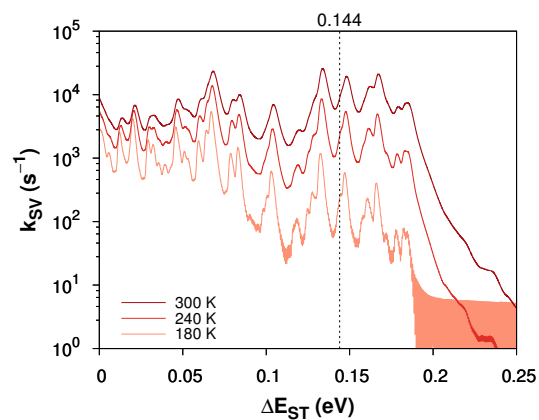

Figure S9: Temperature dependence of the RISC rates of DABNA.  $\Delta E_{ST}$  value from the SCS-CC2 level is marked with a vertical line.

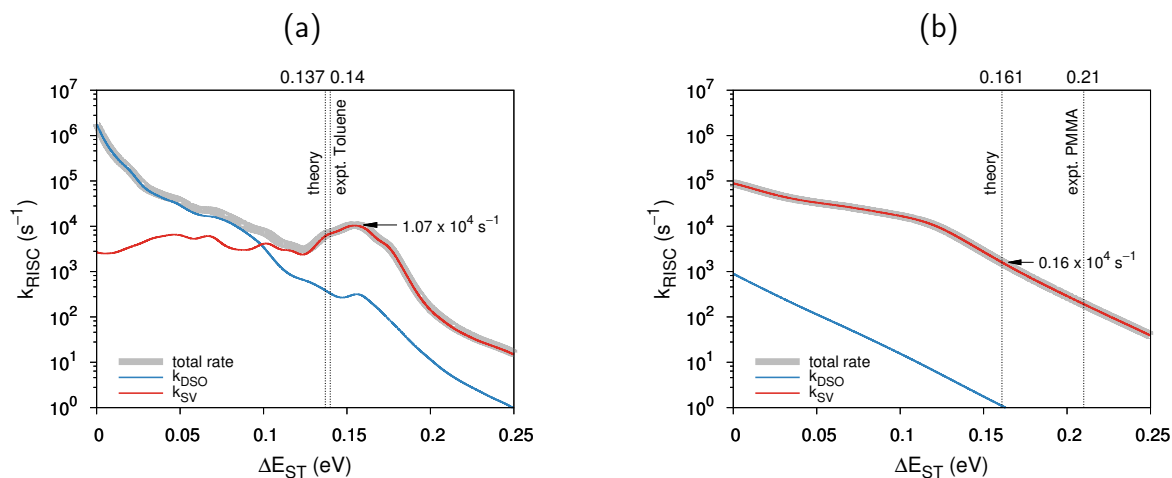

Figure S10: Total RISC rate and its decomposition into DSO and SV contributions for MR-TADF emitters at varying  $\Delta E_{ST}$  values: (a) TBN-TPA; (b) TABNA.  $\Delta E_{ST}$  values from the SCS-CC2 level and experiments are marked with vertical lines.

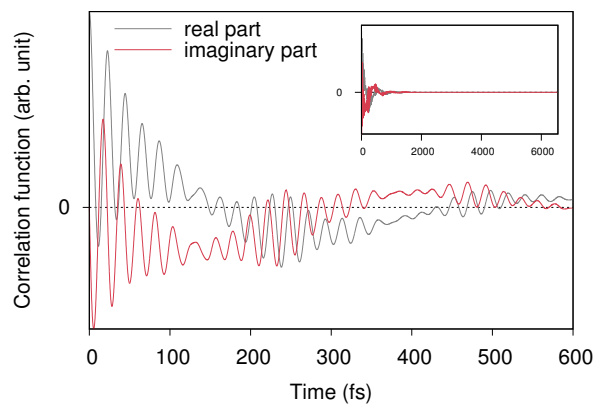

Figure S11: Time correlation function for DABNA in the positive time segment before the Fourier transform. The real part is even and the imaginary part is odd with respect to time inversion. Inset shows the same function to the integration limit of 6553.6 fs.

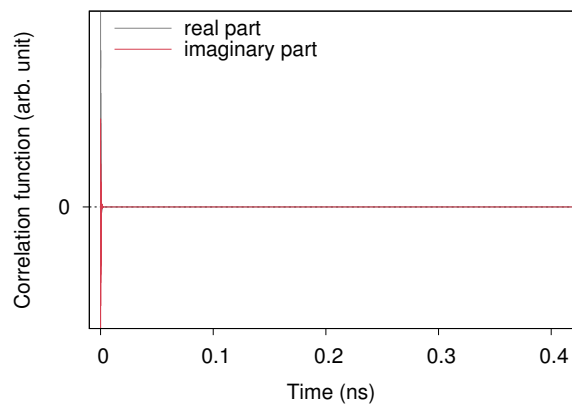

Figure S12: Long time behavior of the time correlation without any approximation for DABNA.



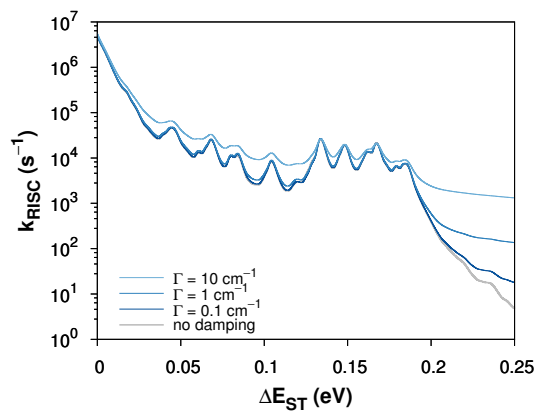

Figure S13: Effect of damping on  $k_{\text{RISC}}$ . Damping was implemented as a Lorentian function  $\delta'(-\Delta E_{\text{ST}} + E_v - E_{v'}) = \Gamma/\pi[\Gamma^2 + (\Delta E_{\text{ST}} - E_v + E_{v'})^2]$  in the place of  $\delta(-\Delta E_{\text{ST}} + E_v - E_{v'})$  in eq S6.

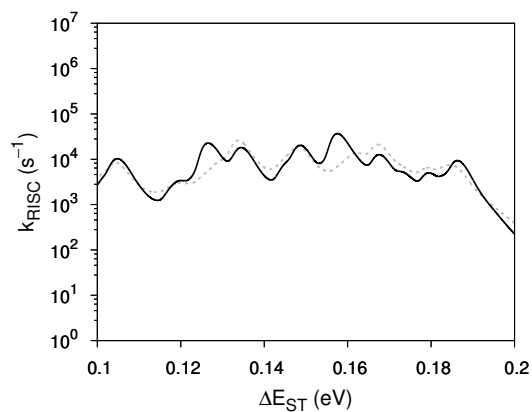

Figure S14: Rate change by approximating the Duschinsky rotation as  $\mathbf{J} = \mathbf{1}$  for DABNA. The black solid line represents the rate after the approximation, while the gray dashed line shows the original data before the approximation as provided in Figure 2a in the main text.

## Supporting Information References

- <sup>S1</sup> Kim, I.; Jeon, S. O.; Jeong, D.; Choi, H.; Son, W. J.; Kim, D.; Rhee, Y. M.; Lee, H. S. *J. Chem. Theory Comput.* **2020**, *16*, 621–632.
- <sup>S2</sup> Marian, C. M. *Wiley Interdiscip. Rev. Comput. Mol. Sci.* **2012**, *2*, 187–203.
- <sup>S3</sup> May, V.; Kühn, O. *Charge and Energy Transfer Dynamics in Molecular Systems*, 3rd ed.; Wiley-VCH, 2011.
- <sup>S4</sup> Ou, Q.; Bellchambers, G. D.; Furche, F.; Subotnik, J. E. *J. Chem. Phys.* **2015**, *142*, 064114.
- <sup>S5</sup> Peng, Q.; Niu, Y.; Shi, Q.; Gao, X.; Shuai, Z. *J. Chem. Theory Comput.* **2013**, *9*, 1132–1143.
- <sup>S6</sup> Baiardi, A.; Bloino, J.; Barone, V. *J. Chem. Theory Comput.* **2013**, *9*, 4097–4115.
- <sup>S7</sup> De Souza, B.; Farias, G.; Neese, F.; Izsák, R. *J. Chem. Theory Comput.* **2019**, *15*, 1896–1904.
- <sup>S8</sup> Reimers, J. R. *J. Chem. Phys.* **2001**, *115*, 9103–9109.
- <sup>S9</sup> Friese, D. H.; Törk, L.; Hättig, C. *J. Chem. Phys.* **2014**, *141*, 194106.
- <sup>S10</sup> Niu, Y.; Peng, Q.; Deng, C.; Gao, X.; Shuai, Z. *J. Phys. Chem. A* **2010**, *114*, 7817–7831.
- <sup>S11</sup> Etinski, M.; Tatchen, J.; Marian, C. M. *J. Chem. Phys.* **2011**, *134*, 154105.
- <sup>S12</sup> Kim, H. W.; Rhee, Y. M. *J. Chem. Phys.* **2014**, *140*, 184106.
- <sup>S13</sup> Kim, C. W.; Park, J. W.; Rhee, Y. M. *J. Phys. Chem. Lett.* **2015**, *6*, 2875–2880.
- <sup>S14</sup> Kim, H.; Nassimi, A.; Kapral, R. *J. Chem. Phys.* **2008**, *129*, 084102.
- <sup>S15</sup> Bonella, S.; Coker, D. F. *J. Chem. Phys.* **2003**, *118*, 4370–4385.

- <sup>S16</sup> Mandal, A.; Yamijala, S. S.; Huo, P. *J. Chem. Theory Comput.* **2018**, *14*, 1828–1840.
- <sup>S17</sup> Zhou, W.; Mandal, A.; Huo, P. *J. Phys. Chem. Lett.* **2019**, *10*, 7062–7070.
- <sup>S18</sup> Park, J. W.; Rhee, Y. M. *J. Chem. Phys.* **2014**, *140*, 164112.
- <sup>S19</sup> Park, S. W.; Yang, J. H.; Choi, H.; Rhee, Y. M.; Kim, D. *J. Phys. Chem. A* **2020**, *124*, 10384–10392.
